1 **Title**

2 **Executive control by fronto-parietal activity explains counterintuitive decision**

3 **behavior in complex value-based decision-making**

4

5 Teppei Matsui<sup>1,2</sup>, Yoshiki Hattori<sup>3</sup>, Kaho Tsumura<sup>3</sup>, Ryuta Aoki<sup>4</sup>, Masaki Takeda<sup>4</sup>,

6 Kiyoshi Nakahara<sup>4</sup>, Koji Jimura<sup>3,4</sup>

7

8 1. Department of Biology, Okayama University, Okayama, Japan

9 2. JST-PRESTO, Japan Science and Technology Agency, Tokyo, Japan

10 3. Department of Biosciences and Informatics, Keio University, Yokohama, Japan

11 4. Research Center for Brain Communication, Kochi Institute of Technology, Kami,  
12 Japan

13

14 Corresponding should be address to:

15 Koji Jimura, Ph.D.

16 Department of Biosciences and Informatics,

17 Keio University,

18 3-14-1 Hiyoshi, Kohoku-ku,

19 Yokohama, 223-0061, Japan

20 Email: jimura@bio.keio.ac.jp

21 Phone: +81-45-566-1625

22

## 1 **Abstract**

2 In real life, humans make decisions by taking into account multiple independent  
3 factors, such as delay and probability. Cognitive psychology suggests that cognitive  
4 control mechanisms play a key role when facing such complex task conditions.  
5 However, in value-based decision-making, it still remains unclear to what extent  
6 cognitive control mechanisms become essential when the task condition is complex.  
7 In this study, we investigated decision-making behaviors and underlying neural  
8 mechanisms using a multifactor gambling task where participants simultaneously  
9 considered probability and delay. Decision-making behavior in the multifactor task  
10 was modulated by both probability and delay. The behavioral effect of probability  
11 was stronger than delay, consistent with previous studies. Furthermore, in a subset of  
12 conditions that recruited fronto-parietal activations, reaction times were  
13 paradoxically elongated despite lower probabilistic uncertainty. Notably, such a  
14 reaction time elongation did not occur in control tasks involving single factors. Meta-  
15 analysis of brain activations suggested an association between the paradoxical  
16 increase of reaction time and strategy switching. Together, these results suggest a  
17 novel aspect of complex value-based decision-makings that is strongly influenced by  
18 fronto-parietal cognitive control.

## 19 20 **Keywords**

21 Decision-Making, Uncertainty, Value, Cognitive Control, Fronto-parietal network  
22  
23

## 24 **Highlights**

- 25 ● A value-based decision task with concurrent delay and probabilistic uncertainty
- 26 ● Stronger behavioral effect of probability than delay
- 27 ● Paradoxically long reaction time despite low probabilistic uncertainty
- 28 ● The task activated fronto-parietal cognitive control network
- 29 ● Reaction time elongation coincided with activation similar to strategy switching

30

31

## 1 **Introduction**

2 Value-based decision-making is often difficult because participants need to evaluate  
3 a particular option not only based on its current value, but also on contextual factors  
4 that modulate its subjective value (Green et al., 2014). Even in relatively simple  
5 situations in which only a single contextual factor modulates subjective values, the  
6 participant's decision-making behaviors often deviate from that of rational decision-  
7 makers (Chernev, 2003; Kahneman and Tversky, 1979; Simonson and Tversky,  
8 1992). For example, when a participant is asked to choose between obtaining \$100  
9 "1 month later" or "10 years later," they tend to select "1 month later" (Myerson and  
10 Green, 1995; Ostaszewski et al., 1998), a phenomenon known as "delay discounting"  
11 (Ainslie, 2005; Frederick et al., 2002b; Green et al., 1981; Green et al., 1994; Green  
12 et al., 1999; Kirby, 1997; Mischel et al., 1989; Rachlin et al., 1991). Similar to delay,  
13 probabilistic uncertainty to obtain the reward also affects value-based decision-  
14 making, a phenomenon known as "probability discounting" (Camerer, 1995; Green  
15 and Myerson, 2004; Kahneman and Tversky, 1979; Ostaszewski et al., 1998; Rachlin  
16 et al., 1991; Starmer, 2000; Tversky and Kahneman, 1992). For example, when a  
17 participant is asked to choose between obtaining \$100 with a probability of "80%" or  
18 "10%," they tend to choose "80%" (Ostaszewski et al., 1998). The cause of these  
19 deviations from rational decision-makers is often attributed to a tendency of human  
20 participants to minimize the required cognitive effort by controlling decision-making  
21 strategies (Basten et al., 2010; Krajbich et al., 2015; McGuire and Botvinick, 2010;  
22 Payne et al., 1963; Smith and Walker, 1993).

23 Value-based decision-making tasks can be even more complex in real-life  
24 settings where multiple contextual factors simultaneously modulate the values. For  
25 example, an investor evaluates the value of a company not only based on its current  
26 price but also according to uncertainty regarding its future success. At the same time,  
27 the investor needs to consider a delay to obtain a return on investment, *i.e.* the time it  
28 takes for the company to succeed, because the goal of the investor is often to  
29 maximize the profit within a given time. Recent behavioral studies have suggested  
30 that human participants can effectively handle multiple contextual factors  
31 simultaneously, but do not treat each factor equally (Vanderveldt et al., 2015). In  
32 decision-making tasks where both the uncertainty and delay of outcomes are  
33 manipulated, subjective values of given options were more strongly influenced by

1 probability discounting than delay discounting (Blackburn and El-Deredy, 2013;  
2 Vanderveldt et al., 2015). This asymmetric processing of delay and probability  
3 suggest that cognitive processing is likely to differ between simple and complex  
4 value-based decision-making. The nature of cognitive processing and the associated  
5 brain mechanism that differentiate simple and complex value-based decision-  
6 making, however, remains elusive.

7         Neuroimaging studies of complex decision-making tasks have revealed  
8 that coordinated activity in the dorsolateral frontal and parietal areas enables the  
9 cognitive control necessary to handle complex task-conditions (Camilleri et al.,  
10 2018; Cocuzza et al., 2020; Dosenbach et al., 2006). On the other hand, in value-  
11 based decision-making, previous studies mostly highlighted orbital-frontal and  
12 midbrain areas related to value-coding, but not frontal-parietal areas related to  
13 cognitive control (Daw et al., 2006; Suzuki et al., 2017; Tom et al., 2007). Previous  
14 neuroimaging studies which used a complex value-based decision task (Treadway et  
15 al., 2009) also focused mostly on midbrain areas (Treadway et al., 2012; Huang et  
16 al., 2016). There are two possibilities to explain this absence of involvement of  
17 frontal-parietal areas in previous value-based decision-making studies: One  
18 possibility is that the lack of frontal-parietal activation is due to the fact that previous  
19 studies used simple value-based decision tasks in which only a single factor, such as  
20 the delay or probability, modulated the values (Hare et al., 2008; Kable and  
21 Glimcher, 2007; Tanaka et al., 2004). It is probable that frontal-parietal areas are  
22 additionally recruited in more complex value-based decision-making tasks where  
23 multiple contextual factors simultaneously affect the value. Another possibility is  
24 that value-coding in the frontal cortex and midbrain areas, by themselves, has  
25 sufficient computational capacity to calculate option values (Jimura et al., 2018;  
26 McClure et al., 2007; McClure et al., 2004). In such a case, cognitive control by  
27 frontal-parietal areas may not be necessary even in complex task-conditions in which  
28 multiple contextual factors modulate the values. In the present study, we  
29 hypothesized that the former possibility was true and devised a multifactor, value-  
30 based decision-making task which was sufficiently complex to test the hypothesis.

31         In the present study, we investigated the decision-making behaviors and  
32 neural activity underlying decision-making in complex conditions with multiple  
33 factors modulating the values. Our *a priori* hypothesis was that complex, but not

1 simple, value-based decision-making recruits cognitive control mechanisms  
 2 necessary to handle complex task conditions. To isolate the effect of simple and  
 3 complex task-conditions, we designed a gambling task in which probabilistic  
 4 uncertainty and delay to outcome was simultaneously varied (DP-task) and control  
 5 tasks in which probabilistic uncertainty or delay to outcome was varied alone (D-  
 6 task, P-task) (Fig. 1). The quantitative conditions presented in the D-task and P-task  
 7 were matched with subsets of conditions in DP-task, which allowed us to isolate the  
 8 effect of presenting multiple factors simultaneously. The brain activity in the tasks  
 9 was recorded by functional magnetic resonance imaging (fMRI) to investigate the  
 10 cognitive process specifically used in multi-factor decision-making.  
 11

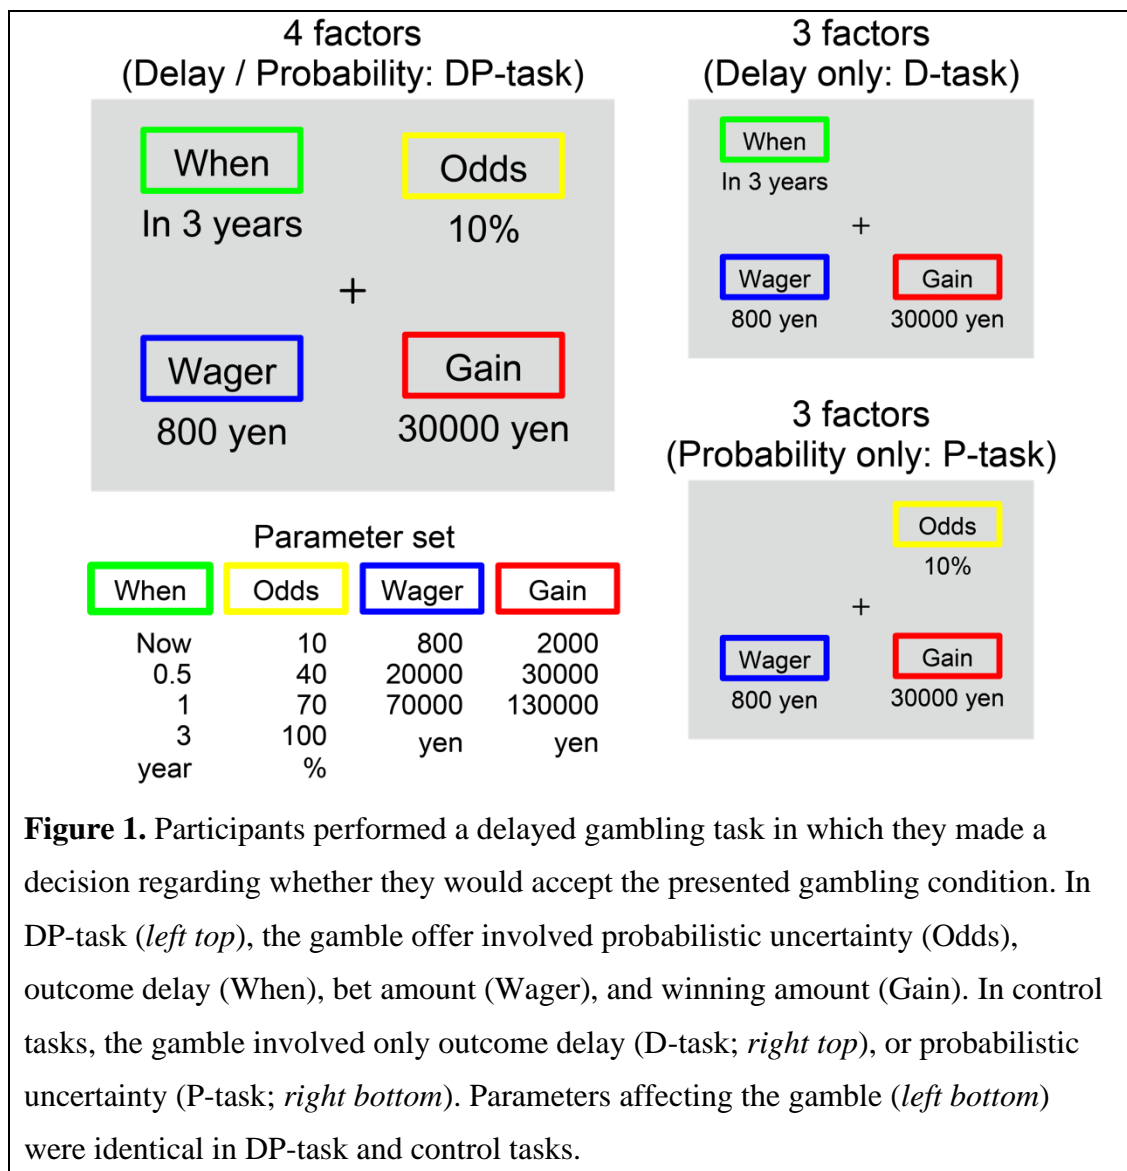

12  
 13 **Figure 1.** Participants performed a delayed gambling task in which they made a  
 14 decision regarding whether they would accept the presented gambling condition. In  
 15 DP-task (*left top*), the gamble offer involved probabilistic uncertainty (Odds),  
 16 outcome delay (When), bet amount (Wager), and winning amount (Gain). In control  
 17 tasks, the gamble involved only outcome delay (D-task; *right top*), or probabilistic  
 18 uncertainty (P-task; *right bottom*). Parameters affecting the gamble (*left bottom*)  
 19 were identical in DP-task and control tasks.

# 1 **Materials and Methods**

## 2 *Objectives and hypotheses*

3 Based on previous behavioral and neuroimaging studies, we hypothesized that  
4 cognitive processing differs between simple and complex value-based decision-  
5 making. More specifically, we hypothesized that the cognitive processing related to  
6 cognitive mechanisms is recruited in complex, but not simple, value-based decision-  
7 making. The present behavioral and neuroimaging experiments were conducted to  
8 test this *a priori* hypothesis. Based on the behavioral results, we further  
9 hypothesized, *a posteriori*, that the particular cognitive control mechanism employed  
10 in complex value-based decision-making is related to strategy switching. This latter  
11 hypothesis was examined with a meta-analysis and a functional connectivity  
12 analysis, and provided a unified interpretation of the behavioral and neuroimaging  
13 results.

14

## 15 *Participants*

16 Written informed consent was obtained from 25 healthy right-handed  
17 participants (9 females; mean age, 19.5; age range, 18–22). Experimental procedures  
18 were approved by the institutional review board of Keio University and Kochi  
19 University of Technology. Participants received 2000 yen for participating.

20

## 21 *Behavioral procedures*

22 Participants performed a decision-making task while fMRI was performed.  
23 In each trial, a gambling situation was presented on the screen, and participants made  
24 a judgement about whether they would accept or reject the gamble and pressed a  
25 corresponding button to indicate their decision. In the main task (DP-task), the  
26 gambling situation was defined by following factors (Fig 1 *left top*): 1) outcome  
27 delay (when the outcome of the gamble would be provided: When), 2) probabilistic  
28 uncertainty (how high chance to win the gamble is: Odd), 3) amount of bet to gamble  
29 (Wager), and 4) amount of gain when winning the gamble (Gain). Positions of the  
30 four display materials were randomized across trials. We denoted this delayed  
31 gambling task as DP-task, since the task required participants to take into account  
32 both delay and probability to make a decision. Two control tasks were also used in  
33 addition to DP-task. In one control task, probabilistic uncertainty was set as a

1 constant (to 100%) and only delay, wager, and gain were varied (D-task; Fig 1 *right*  
2 *top*). In another control condition, the outcome delay was set as a constant (to  
3 “Now”) and only probability, wager, and gain were varied (P-task; Fig 1 *right*  
4 *bottom*). In all the three tasks, variables were drawn from the same parameter set (Fig  
5 1 *left bottom*). Note that quantitative conditions of the trials in DP-task with 100%  
6 probability were logically equivalent to trials in D-task. Likewise, quantitative  
7 conditions in trials with immediate outcome (delay = “Now”) were logically  
8 equivalent to the trials in P-task. Participants were asked to perform the task as if the  
9 gambling conditions were real.

10         Trials of each task were presented in a blocked manner to minimize  
11 cognitive demand due to the change in the number of factors. The block-wise  
12 presentation of the three tasks has been shown to yield consistent results compared to  
13 an alternative presentation style where the three tasks were changed on a trial-by-trial  
14 basis (Vanderveldt et al., 2015). Each scanning session involved 2 blocks of DP-task,  
15 1 block of D- task, and 1 block of P-task. The order of the blocks was  
16 pseudorandomized such that DP-task was unrepeated. Each task block consisted of 9  
17 decision trials (6 sec each), 2 fixation trials (3 sec each) and 1 distractor trial (6 sec),  
18 lasting 72 seconds in total. At the beginning and the end of each block, the start and  
19 end queues were displayed for 3 seconds, respectively.

20         Because of the complexity of choice information consisting of 4 factors,  
21 we adopted only 4 levels for each factor in order to minimize general task difficulty.  
22 Additionally, to simplify participants’ judgement in complex decision situations,  
23 participants were required to make a decision on one choice option, whereas standard  
24 intertemporal tasks have presented two choice options simultaneously (e.g., Green et  
25 al. 1999; Green and Myerson 2004; Kable and Glimcher 2007; Vanderveldt et al.  
26 2015, Jimura et al. 2018).

27         The distractor trial was imposed to ensure that the participants did not  
28 make decisions randomly without evaluating the gamble factors. Specifically,  
29 participants were presented with a gamble situation where reasonable decision was  
30 clear, and expected to reject the gamble (e.g., Wagers exceeded Gain, probability  
31 was set to 0%, and delay was set to 1000 years). The gamble stimulus set on the  
32 screen disappeared when the participant made a response.

1           Prior to fMRI scanning, participants received an instruction session for the  
2 tasks outside of the scanner using the actual experimental stimulus displayed on a  
3 computer monitor. They were told that the number of factors presented on the screen  
4 were 4 (DP-task) or 3 (D-task and P-task). They were also notified about the  
5 distractor trials and were instructed to reject. Then they practiced the three tasks (DP-  
6 task, D-task and P-task) for one block each. The tasks were controlled using E-Prime  
7 (Psychology Software Tools, Sharpburg PA, USA).

### 8 9 *Imaging procedures*

10           A 3T MRI scanner (Siemens Verio, Germany) with a 32ch head coil  
11 mounted was used for MRI imaging. Both anatomical and functional images were  
12 acquired from each participant. High-resolution anatomical images were acquired  
13 using an MP-RAGE T1-weighted sequence [repetition time (TR) = 9.7 s; echo time  
14 (TE) = 4.0 msec, flip angle (FA) = 10°, slice thickness = 1 mm; in-plane resolution =  
15  $1 \times 1 \text{ mm}^2$ ]. Functional images were acquired using multi-band acceleration EPI  
16 [repetition time (TR) = 800 msec; echo time (TE) = 30 msec; number of slices = 80;  
17 slice thickness = 2 mm; flip angle = 45°; in-plane resolution =  $3 \times 3 \text{ mm}^2$ ; multiband  
18 factor = 8], allowing complete brain coverage at a high signal-to-noise ratio. Each  
19 functional run involved 459 volumes (6 minutes and 7 seconds). Six runs were  
20 performed for each participant (total of 2754 volumes). The first 10 volumes of each  
21 scan were discarded to account for signal equilibrium.

### 22 23 *Behavioral analysis*

24           To evaluate participants' decision and behavior, accept rate (number of  
25 accepted trials divided by the total number of trials) and mean reaction time were  
26 calculated for each task. In DP-task, accept rate and reaction times were calculated  
27 for each combination of probability ("Odds") and delay ("When"). Accept rate and  
28 reaction times were similarly calculated for each delay and each probability for D-  
29 task and P-task, respectively. Statistical testing of the effects of the probability and  
30 delay on accept rate and reaction times were performed by repeated measures  
31 ANOVA using SPSS Statistics 23 (IBM Corporation, NY USA). Similarly, the effect  
32 of simultaneous presentation of probability and delay was estimated using ANOVA



1 independently for DP-task trials without uncertainty (100%) versus D-task trial, and  
2 DP-task trials without delay (Now) versus P-task.

3

#### 4 *Image preprocessing*

5 Image preprocessing was performed using SPM12  
6 (<http://www.fil.ion.ucl.ac.uk/spm/software/spm12/>). All functional images were first  
7 temporally aligned, corrected for movement using a rigid-body rotation and  
8 translation correction, and then registered to the participant's anatomical images. The  
9 functional images were subsequently spatially normalized to a standard MNI  
10 template with normalization parameters estimated based on the anatomical scans.  
11 The images were resampled into 2-mm isotropic voxels, and spatially smoothed with  
12 a 6-mm full-width at half-maximum (FWHM) Gaussian kernel.

13

#### 14 *Single-level analysis*

15 A general-linear model (GLM) approach was used to estimate task events  
16 and parametrical effects of gamble parameters. For each participant, trial events were  
17 time-locked to the presentation of the gambling situation, lasting until the  
18 participants' response by the button press. Effects of interest were acceptance (accept  
19 or reject), tasks (DP-, P-, or D-tasks), delay (DP- and D-tasks) and probability (DP-  
20 and P-tasks). In separate GLM estimations, DP-task trials without uncertainty  
21 (100%), P-task trials, DP-task trial without delay (Now), and D-task trials were  
22 separately coded to allow direct comparison of quantitatively identical trials. Trials  
23 in DP-task without uncertainty (DP-100%) were identical to trials in D-task except  
24 that reward probability (100% in both types of trials) was explicitly presented to  
25 participants in DP-task. Similarly, trials in DP-task without delay (DP-Now) were  
26 quantitatively identical to trials in P-task except for explicit presentation of reward  
27 timing in DP-task. Brain activity was also compared between DP-100% and DP-Now  
28 using a separate GLM analysis. Trial events were then convolved with canonical  
29 HRF implemented in SPM.

30 We contrasted parameter estimates between 1) accept and reject trials (Fig.  
31 S2C and Table S3), 2) 100% Odds trials in DP-task vs. D-task trials (Fig. 4A and  
32 Table S4), 3) Now trials in DP-task vs. P-task trials (Fig. 4B and Table S6), and 4)  
33 100% Odds trials and other trials in DP-task (Fig 6C and Table S7).

1 For each task block, distractor trials, start cues, and end cues were also  
2 coded in GLM as nuisance regressors. Six-axis head motions, white matter, and  
3 cerebrospinal fluid (CSF) signals were also added as nuisance regressors. When  
4 extracting white matter and CSF signals, spatially normalized T1 anatomical images  
5 were segmented into white matter, cerebrospinal fluid (CSF), gray matter, bone, soft  
6 tissue, and background (air) using SPM12. Then, fMRI signal time courses were  
7 extracted using white matter and CSF images as masks.

8 In order to test whether the differential activity between DP-100% and D-  
9 task trials (Fig. 4A) could be explained by a general difference in cognitive load, we  
10 performed supplementary GLM analysis, where reaction times (RTs) in the DP-  
11 100% trials and D-task trials were coded as a single nuisance regressor in a GLM.

### 12 *Group-level analysis*

13 For the group level analysis, beta maps were first contrasted within each  
14 participant and then collected from all participants. Statistical testing was performed  
15 based on nonparametric permutation testing (5000 times) implemented in *randomise*  
16 in FSL suite (Winkler et al., 2014) (<https://fsl.fmrib.ox.ac.uk/fsl/fslwiki/Randomise>).  
17 Clusterwise whole-brain statistical correction was performed for voxel clusters  
18 defined by a threshold ( $P < 0.001$ , uncorrected). Clusters showing significance level  
19 above  $P < 0.05$  corrected for multiple comparisons were used as a functional mask  
20 associated the contrasts of interest described above. This group-analysis procedure  
21 was empirically validated to appropriately control false positive rates (Eklund et al.,  
22 2016). The voxel clusters listed in Tables S1-7 were also subjected to whole-brain  
23 corrections using the family-wise error rate based on the Gaussian random field  
24 theory implemented in SPM, and all clusters were significant.

### 25 *Map decoding.*

26 To characterize the current activation maps functionally, the maps for the  
27 contrasts of DP-100% vs. D-task, and trials with 100% Odds (DP-100%) vs. all the  
28 other probability conditions (10%, 40% and 70%) in DP-task, together denoted “DP-  
29 Others,” were decoded. We note that the contrast of DP-Now vs. P-task did not result  
30 in significant brain activations, hence the contrast is not described in the following.  
31 The decoder was trained to weight a term list that characterizes a 3D brain map  
32  
33

1 based on meta-analysis of functional brain mapping (<https://neurosynth.org/decoder/>;  
2 Yarkoni et al., 2011). High weight terms reflect greater topographical similarity  
3 between the activation maps and functional brain maps related to the words in the  
4 meta-analysis (Yarkoni et al. 2011). Full lists of weights and terms are available in  
5 Supplementary data.

6 Then the term lists were visualized as word clouds where the size of the  
7 words reflects the term weights. Anatomical terms and terms unrelated to brain  
8 function were excluded. Specifically, we first eliminated anatomical and general  
9 terms such as “ventrolateral,” “frontal gyrus,” and “character.” The list also included  
10 terms that are similar and/or semantically overlapping; for example, “attention” and  
11 “attentional” and “working memory” and “working.” We merged such overlapping  
12 terms into one with a weight equal to the sum of the merged terms’ weights. After  
13 this elimination procedure, we listed the top 50 terms with higher weights.

14 We show word clouds for the contrasts of DP-100% vs. D-task trials, and  
15 DP-100% vs. DP-others trials. Because the tested conditions (DP-100%) were  
16 identical in these clouds, we were reluctant to conduct a quantitative analysis of  
17 similarity, and instead compared the word clouds qualitatively.

18

### 19 *Meta-analysis maps.*

20 In order to further characterize the current activation maps, meta-analysis  
21 maps were obtained from Neurosynth (<https://neurosynth.org/>; Yarkoni et al., 2011).  
22 We obtained 3D maps for the search words “executive control” and “cognitive  
23 control” ( $P < 0.01$  with whole-brain correction based on false discovery rate of  
24 uniformity test). Then, each of the two maps was binarized, and logical OR of the  
25 two binarize maps was calculated on voxel-by-voxel basis. The OR map was defined  
26 as meta-analysis mask of executive/cognitive control. This procedure was also  
27 applied to meta-analysis maps based on association tests instead of uniformity tests.  
28 The meta-analysis maps of switching with uniformity and association tests were  
29 created with similar procedure, in which “switch” and “switching” were used for the  
30 search words of Neurosynth.

31

### 32 *Region of interest (ROI) analysis.*

1 ROI analysis was performed to test whether the brain regions identified by  
2 the meta-analysis showed prominent activations in the current task contrasts. ROIs  
3 were defined as the meta-analysis masks as created above for executive/cognitive  
4 control and switching based on uniformity and association tests (yellow and red  
5 voxels in Figs 5B/D and S4A/4C). Then, for each ROI, signal magnitudes of the  
6 contrasts of DP-100% vs. D-task and DP-100% vs. DP-Others were calculated using  
7 *fslmeants* implemented in FSL.

8  
9 *Psychophysiological interaction analysis.*

10 In order to examine task-related interregional interactions among brain  
11 regions during multifactor decision-making, psychophysiological interaction (PPI)  
12 analysis was performed using SPM 12 (Friston et al., 1997). The current analysis  
13 focused on brain regions and their connectivity involved in strategy switching (see  
14 Results). ROIs were defined as voxel clusters showing statistically significant  
15 activation regions in at least one of either DP-task trials without uncertainty (100%)  
16 versus other DP-task trials (Fig 6A) or DP-task trials without uncertainty (100%)  
17 versus D-task trials (Fig 4A). Then, a total of six regions of interest (ROIs) were  
18 obtained: bilateral lateral prefrontal cortex, bilateral superior parietal lobe, and  
19 bilateral occipitotemporal cortex (Fig 6C, *right*). We defined the ROIs based on the  
20 contrast that showed behavioral effect (DP-100% vs D-task).

21 For each ROI, the signal time course was extracted as the first eigenvariate  
22 of the voxel clusters. The percentage variances explained by the first eigenvariates  
23 were  $66.29 \pm 9.33$  (mean  $\pm$  SD) in the left Occipital Temporal Cortex (OTC) ROI,  
24  $64.26 \pm 8.65$  in the right OTC ROI,  $75.98 \pm 7.63$  in the left SPC ROI,  $69.85 \pm 7.15$  in  
25 the right SPC ROI,  $66.08 \pm 7.01$  in the left posterior Inferior Frontal Cortex (pIFC)  
26 ROI, and  $64.00 \pm 9.19$  in the right pIFC ROI.

27 A psychological variable was defined as a time series of contrast of  
28 interest, DP-task trials without uncertainty versus D-task trials. An interaction effect  
29 of the seed time course and psychological variable was calculated based on SPM12.  
30 The interaction effect, the psychological variable, and the timecourse of the seed  
31 region were included in GLM. As additional nuisance effects, nuisance behavioral  
32 events, six-axes head-motion, and time courses of white matter signal and  
33 cerebrospinal fluid signal were also included in GLM. Then, voxel-wise GLM

1 estimations were performed for all other ROIs (target), and beta-values were  
2 averaged within each ROI for each participant. Finally, averaged beta-values of PPI  
3 were collected for all combinations of seed/target ROIs (total 30) from all  
4 participants, group-level effects were tested.

5 For statistical testing, PPIs between seed and target regions were calculated  
6 using *fslmeants*, and averaged across contralateral and ipsilateral hemispheres, as we  
7 did not observe strong hemispheric asymmetry in PPIs (Fig 6C; Misonou and Jimura  
8 2021). Then, the significance of the PPI strength was tested by the one-sample t-test.  
9 P-values were corrected for multiple comparisons based on Bonferroni correction.

10

## 1 **Results**

2           We collected fMRI data while participants decided whether to accept or  
3 reject gambles that offered a chance of gaining or losing money. For each trial, the  
4 chance of gaining money and the time to outcome were varied simultaneously and  
5 independently. In each trial, the price for betting (“Wager”), the amount of gain  
6 (“Gain”), the probability of winning (“Odds”), and the time to outcome (“When”)  
7 were presented on the screen (DP-task) (Fig. 1). Participants were asked to decide  
8 whether to accept the delayed gamble and then indicate their decisions by pressing a  
9 button. In two control tasks, either probability or delay to outcome was set as a  
10 constant and excluded from the offer (D-task, P-task; Fig. 1).

11           The accept rate for DP-task was higher for conditions with a smaller  
12 Wager [ $t(24) = -5.1, P < 0.001$ ] and a greater Gain [ $t(24) = 2.2, P < 0.05$ ] (Fig. S1),  
13 confirming that participants made decisions based on the presented amount of Wager  
14 and Gain. For the same Wager and Gain, participants accepted the delayed gamble  
15 more when the Odds were higher (Fig 2), consistent with probability discounting  
16 (Green and Myerson, 2004; Kahneman and Tversky, 1979; Tversky and Kahneman,  
17 1992). Repeated measures analysis of variance (ANOVA) with 4 levels of Odds and  
18 4 levels of When as factors revealed a significant positive effect of Odds on the  
19 accept rate [ $F(1,24) = 459.8; P < 0.001$ ; with linear contrast of Odds]. Similarly,  
20 participants accepted the delayed gamble more if When was shorter [ $F(1,24) = 6.2; P$   
21  $< 0.05$ ; with linear contrast of When; Fig. 2], consistent with delay discounting  
22 (Frederick et al., 2002a, b). The interaction between Odds and When was not  
23 significant [ $F(1,24) = 3.5; P = 0.08$ ; with linear contrast of an interaction of Odds and  
24 When]. Thus, the level of statistical significance was higher for the probability than  
25 the delay, consistent with previous studies reporting that the effect of probability was  
26 stronger than that of the delay when presented together (Blackburn and El-Deredy,  
27 2013; Vanderveldt et al., 2015). These results collectively suggest that participants  
28 performed the decision-making task in a value-based manner despite the complexity  
29 of the task structure.

30

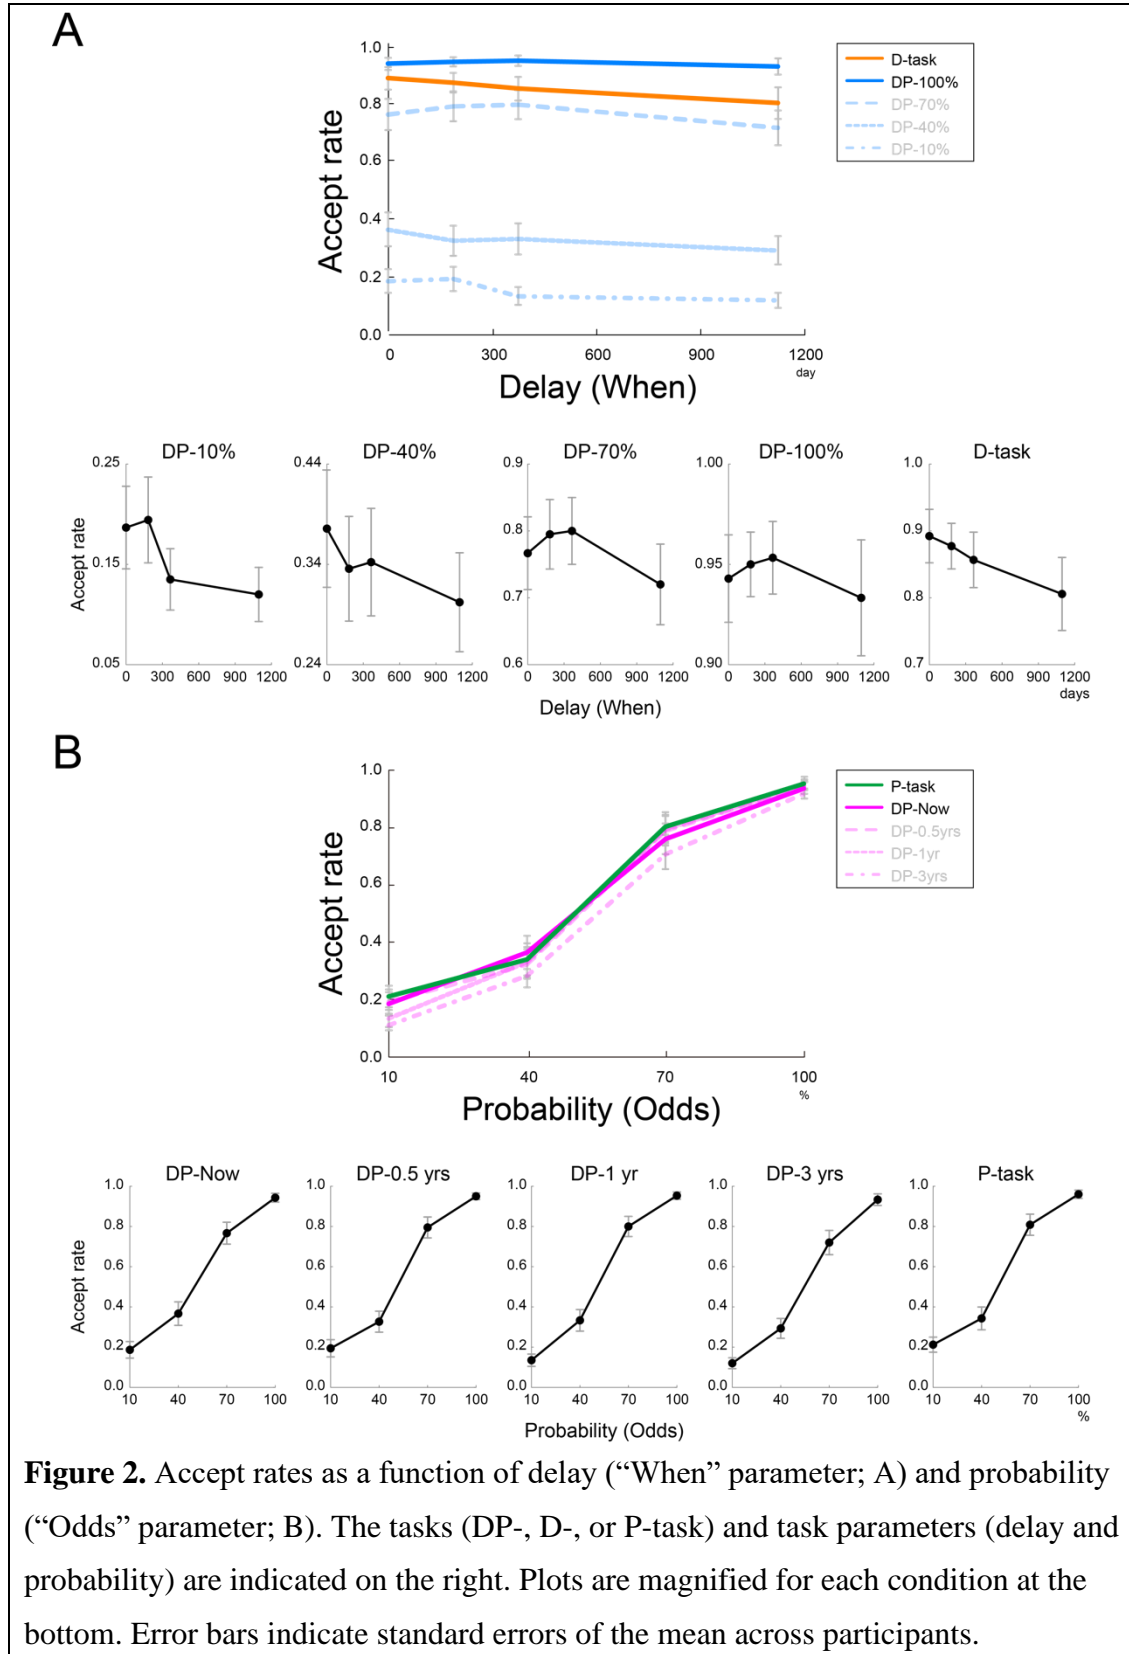

1  
2  
3  
4  
5  
6

1           We next examined whether or not probability and delay affected  
2 participants' decisions differently when both factors were presented together versus  
3 when each factor was presented alone. To isolate the effect of the simultaneous  
4 presentation, we set the quantitative conditions of the control tasks (D-task and P-  
5 task) equivalent to subsets of conditions in the DP-task: Conditions in the D-task  
6 were quantitatively equivalent to the conditions with "Odds = 100%" in the DP-task.  
7 Similarly, conditions in the P-task were quantitatively equivalent to the conditions  
8 with "When = Now" in the DP-task (unless otherwise noted, comparisons between  
9 the DP-task and the D-task or P-task were done using the quantitatively equivalent  
10 conditions). Comparing the D-task and DP-task revealed significantly larger accept  
11 rates for the latter [ $t(24) = 2.47$ ;  $P < 0.05$ ; two rightmost panels in Fig. 2A],  
12 suggesting that participants' decisions were altered by explicit presentation of the  
13 probability information in addition to the delay information. In contrast, comparing  
14 the P-task and DP-task showed no significant difference in accept rate [ $t(24) = 1.11$ ;  
15  $P = 0.28$ ; rightmost and leftmost panels in Fig. 2B]. These results indicated that  
16 explicit presentation of probability information (100%), but not delay information  
17 (Now), altered the participants' decision to accept the offer, suggesting that the  
18 probability but not delay, was processed differently depending on whether the two  
19 factors were presented together in the DP-task.

20           To further characterize the decision behavior, we next compared the  
21 reaction times in the DP-task with those in the control tasks. When performing a  
22 cognitively demanding task, reaction time tends to increase as a function of the  
23 number of factors that the participant needs to take into account (Treisman, 1993;  
24 Woodman and Luck, 2004). Reaction time data were not skewed at any levels of  
25 Odds and Delay in the DP-, D-, and P-tasks ( $z_s < 1.50$ ;  $P > 0.14$ ). Consistently,  
26 compared with the D-task, the reaction time was significantly longer in the DP-task  
27 [ $t(24) = 4.35$ ;  $P < 0.0001$ ; two rightmost panels in Fig. 3A]. Similarly, the reaction  
28 time was significantly longer in the DP-task than in the P-task [ $t(24) = 6.51$ ;  $P <$   
29  $0.001$ ; two rightmost panels in Fig. 3B], although the accept rates were equivalent.  
30 Thus, the overall increase in reaction time occurred both for probability and delay,  
31 suggesting that an increase in the number of factors does not simply explain the  
32 increase in the accept rate specifically for probability.



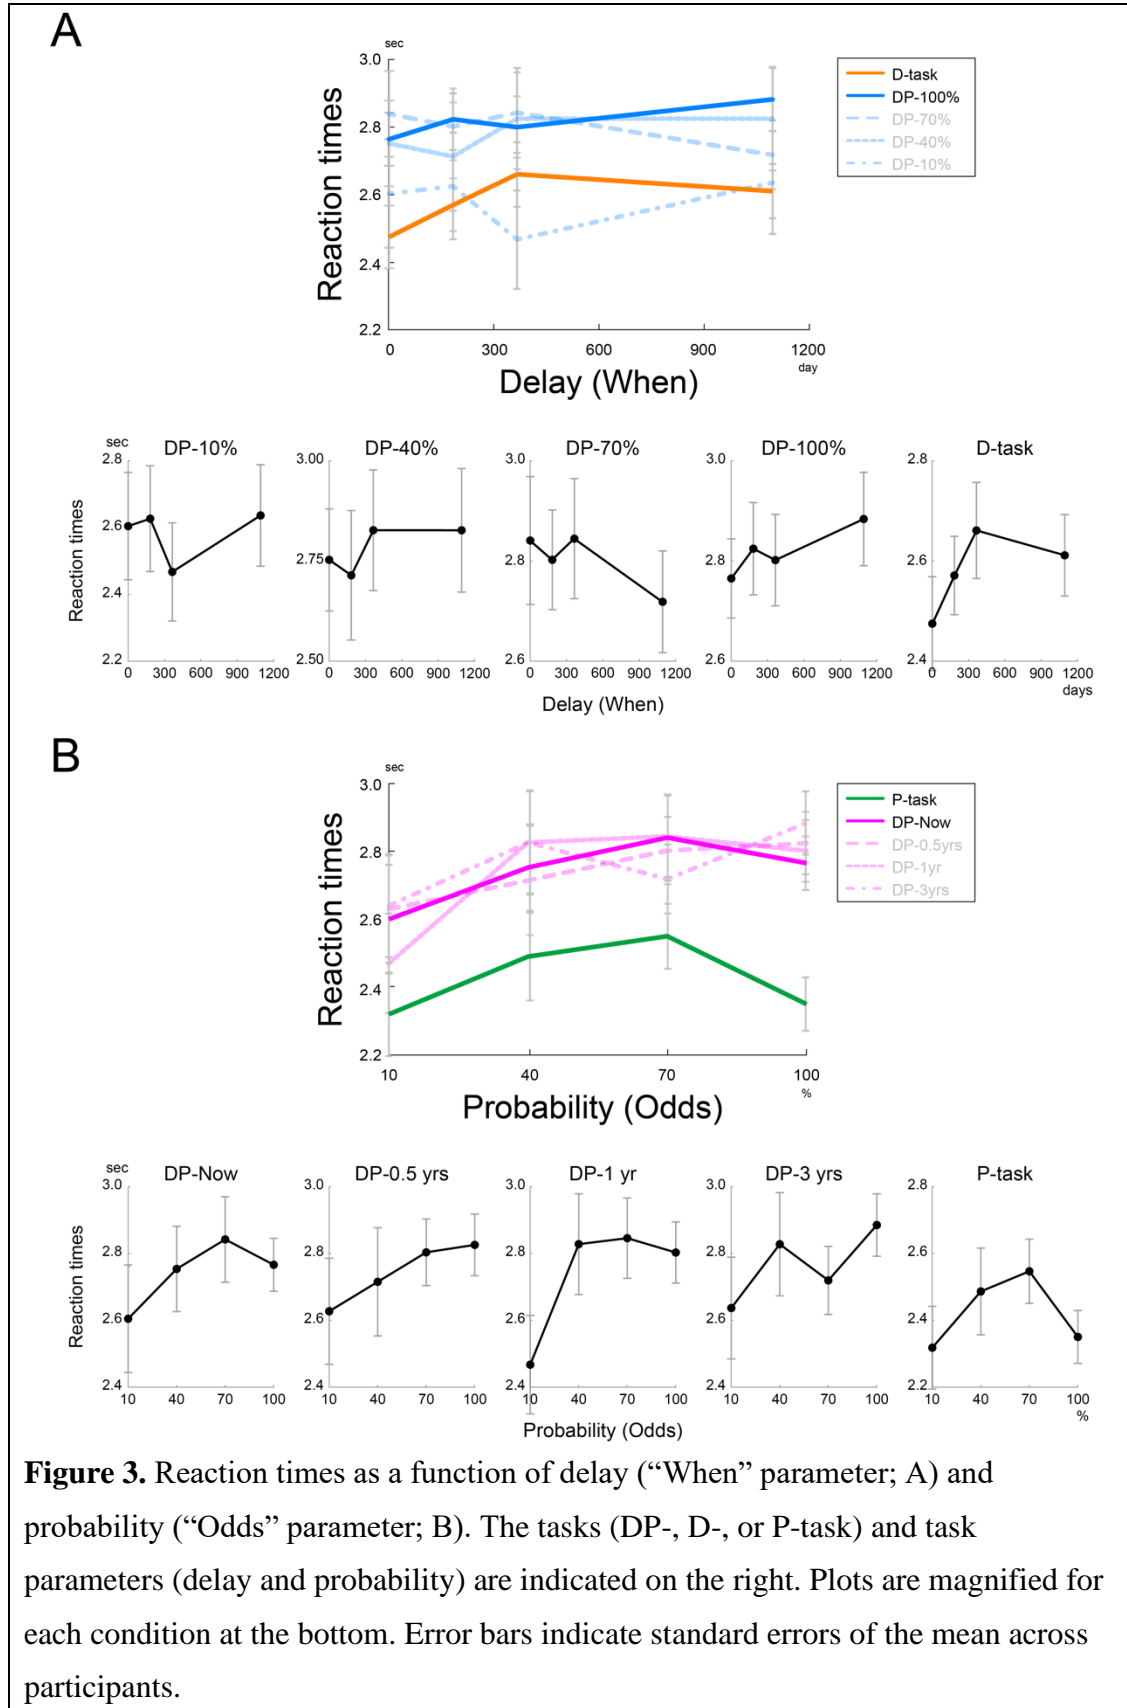

1           Despite the similar increase in overall reaction time, precise relationships  
2 between reaction time and each factor in the DP-task and control tasks revealed a  
3 difference between probability and delay. Of interest, one-way repeated measures  
4 ANOVA with 4 levels of Odds as a factor revealed that reaction time was an inverse  
5 U-shape as a function of Odds in the P-task [ $F(1,24) = 10.77, P < 0.01$ ; with a  
6 planned contrast in which the middle two levels (40% and 70%) were greater than  
7 the two end levels (10% and 100%); the rightmost panel in Fig. 3B]. This was  
8 consistent with previous reports that a participant's decision is faster when the  
9 uncertainty is lower (Bestmann et al., 2008). Indeed, compared with high uncertainty  
10 conditions (*i.e.* 40% and 70% Odds), the reaction time was significantly shorter in  
11 both the 10% Odds [ $t(24) = 2.56, P < 0.05$ ] and 100% Odds conditions [ $t(24) = 2.23,$   
12  $P < 0.05$ ].

13           Then, to examine the effects of Odds and When in the DP-task, a two-way  
14 repeated measures ANOVA was performed with 4 levels of Odds and 4 levels of  
15 When as factors. The main effect of Odds on reaction time was statistically  
16 significant [ $F(1,24) = 4.51, P < 0.05$ ; with the planned contrast of the inverse U-  
17 shape]. However, the relationship between Odds and reaction time did not show a  
18 clear inverse U-shape (Fig. 3B). Specifically, the reaction time was similar for high  
19 uncertainty conditions and the 100% Odds condition [ $t(24) = 0.35, P = 0.77$ ],  
20 whereas the reaction time in the 10% Odds condition was markedly shorter [ $t(24) =$   
21  $3.01, P < 0.01$ ]. In contrast to probability, the delay parameters did not show  
22 significant effect on reaction time [linear contrast:  $F(1, 24) = 0.50, P = .49$ ; inverse  
23 U-shape effect:  $F(1, 24) = 0.19, P = .67$ ]. Thus, these behavioral results suggest that  
24 probability, but not delay, was processed differently in the multifactor task relative to  
25 the single factor control task. Moreover, the analyses of reaction time suggested that  
26 relative to the rest of the conditions, participants underwent additional and parallel  
27 decision processing when the 100% Odds condition was presented explicitly in the  
28 DP-task.

29           Because the prolonged RT in the DP-100% trials by itself does not directly  
30 address change in decision processes in those trials, we examined whether decisions  
31 were made differentially depending on the probability level in the DP-task. For each  
32 Odds level, we performed a logistic regression analysis where choice was predicted  
33 by Wager, Gain, and When parameters. In the trials involving probabilistic

1 uncertainty (i.e., 10%, 40%, and 70%), Wager showed a significant effect on  
2 acceptance [10%:  $t(24) = -3.64$ ,  $P < 0.01$ ; 40%:  $t(24) = -4.41$ ,  $P < 0.001$ ; 70%:  $t(24)$   
3  $= -2.33$ ,  $P < 0.05$ ], indicating that participants rejected gambles more frequently in  
4 trials with higher Wager. Gain also showed significant effect on acceptance [10%:  
5  $t(24) = 2.40$ ,  $P < 0.05$ ; 40%:  $t(24) = 3.65$ ,  $P < 0.01$ , 70%:  $t(24) = 2.21$ ,  $P < 0.05$ ],  
6 indicating that they accepted gambles more frequently in trials with higher Gain. On  
7 the other hand, in trials without probabilistic uncertainty (i.e., 100%), neither Wager  
8 nor Gain showed a significant effect [Wager:  $t(24) = -0.40$ ,  $P = 0.69$ ; Gain:  $t(24) =$   
9  $1.22$ ,  $P = 0.23$ ]. Notably, these beta coefficients of Wager were significantly different  
10 between certain and uncertain trials [100% vs. 10%:  $t(24) = 3.50$ ,  $P < 0.01$ ; 100% vs.  
11 40%:  $t(24) = 4.34$ ,  $P < 0.001$ ; 100% vs. 70%:  $t(24) = 2.32$ ,  $P < 0.05$ ]. For Gain, the  
12 beta coefficient differed between 100% and 40% probability trials [ $t(24) = -2.92$ ,  $P$   
13  $< 0.01$ ]. The differential coefficients clearly demonstrated that participants used  
14 different acceptance strategies depending on probabilistic uncertainty. Specifically,  
15 when the gamble involved probabilistic uncertainty, participants considered Wager  
16 and Gain as aversive and preferred factors, respectively, whereas in the 100% Odds  
17 trials, such consideration was absent.

18           Based on these behavioral results, we next proceeded to examine brain  
19 activations. Consistent with the larger behavioral effect of probability in DP-task,  
20 processing of probability recruited larger and more widespread brain activations than  
21 the processing of delay (Fig S2A-B; Tables S1/2). These parametrical effects did not  
22 differ between DP-task and control tasks, suggesting that the parametrical effects  
23 were comparable in those tasks. To further identify brain regions specifically  
24 recruited during multifactor decision-making, we examined DP-task and control  
25 tasks which had physically equivalent conditions (Fig 4). In particular, we subtracted  
26 activation maps during D-task from those during DP-task with 100% Odds (DP-  
27 100%), aiming to isolate additional processing of probability information in the  
28 multifactor context. The comparison revealed widespread brain activations in the  
29 pIFC, superior parietal lobe (SPL), and OTC (Fig 4A; Table S4). In a separate GLM  
30 analysis, where reaction times in each of DP-100% and D-task trials were coded as a  
31 separate parametric effect (see Materials and Methods), these activations were also  
32 observed (Fig S3 and Table S5), suggesting that these activations were not simply  
33 explained by the difference in general cognitive load between these trials.

1            In contrast, a comparison between the P-task and DP-task with immediate  
2 outcome (DP-Now), which isolated the additional processing of delay information,  
3 revealed much smaller brain activations within the inferior frontal sulcus, the more  
4 ventral anterior part of the IFC (Fig 4B and Table S6). This pattern of brain  
5 activations closely parallels the result that a difference in accept rate between the  
6 multifactor task and the control task was seen for probability but not for delay (Fig.  
7 2A-B).  
8

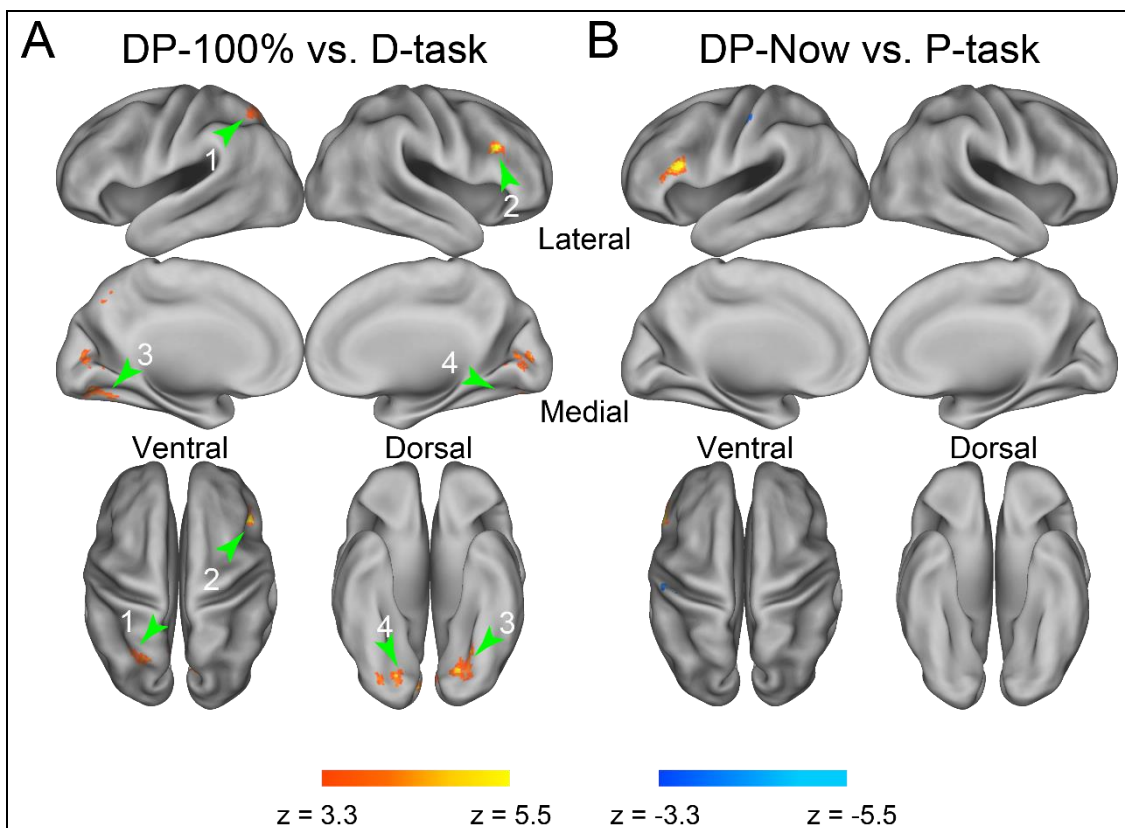

10 **Figure 4.** Brain activations related to processing of probability and delay in the  
11 multifactor task. A) Activation related to probability processing in multifactor  
12 context. Statistical activation maps of brain regions showing greater activity in 100%  
13 Odds trials in DP-task (warm colors) and physically equivalent control trials (D-task)  
14 (cool colors). B) Activation related to delay processing in multifactor context.  
15 Statistical activation maps of brain regions showing greater activity in Now trials in  
16 DP-task (warm colors) and physically equivalent control trials (P-task) (cool colors).  
17 1: left superior parietal lobe; 2: right posterior prefrontal cortex; 3/4: left/right

1 occipitotemporal cortex; 5: left posterior lateral prefrontal cortex; 6: right superior  
2 parietal cortex.

3  
4 One important question about the activation map in DP-task vs. D-task  
5 (Fig. 4A) is what cognitive functions the activation map may reflect. To search for  
6 potentially relevant cognitive functions, we conducted a decoding analysis such that  
7 the activation maps were labeled as word clouds based on their topographical  
8 similarity to functional brain maps in meta-analyses (see Materials and Methods).  
9 The word clouds primarily included cognitive terms related to executive and  
10 cognitive control such as working memory, attention, and task demands (Fig 5A; see  
11 also Supplementary data for full list of words), which is implemented in fronto-  
12 parietal mechanisms (Corbetta and Shulman, 2002; D'Esposito and Postle, 2015;  
13 Dosenbach et al., 2006; Miller and Cohen, 2001). The decoding results suggest that  
14 the fronto-parietal involvements in DP-task vs. D-task (Fig. 4A) reflected executive  
15 and cognitive control functions. To test this possibility more specifically, we  
16 examined spatial characteristics of our results and the meta-analysis map of  
17 executive and cognitive control (see Materials and Methods). The activation location  
18 in the DP-task vs. D-task mostly overlapped with the meta-activation map in fronto-  
19 parietal regions (Fig. 5B). Region of interest (ROI) analysis further revealed  
20 significant activation within the meta-analysis maps during the 100% trials in DP  
21 task, relative to both D-task and DP-task with other Odds [Fig. 5C; DP-100% vs. D-  
22 task:  $t(24) = 2.3$ ,  $P < 0.05$ ; DP-100% vs. DP-others:  $t(24) = 3.6$ ;  $P < 0.01$ ]. However,  
23 relative to uncertain trials (10%), such a significant difference was not observed in  
24 uncertain trials (40% and 70%), in which reaction times were prolonged [ $t(24) =$   
25  $-0.99$ ,  $P = 0.33$ ]. Taken together, the brain activation in DP-task vs. D-task was most  
26 likely related to cognitive control.

27

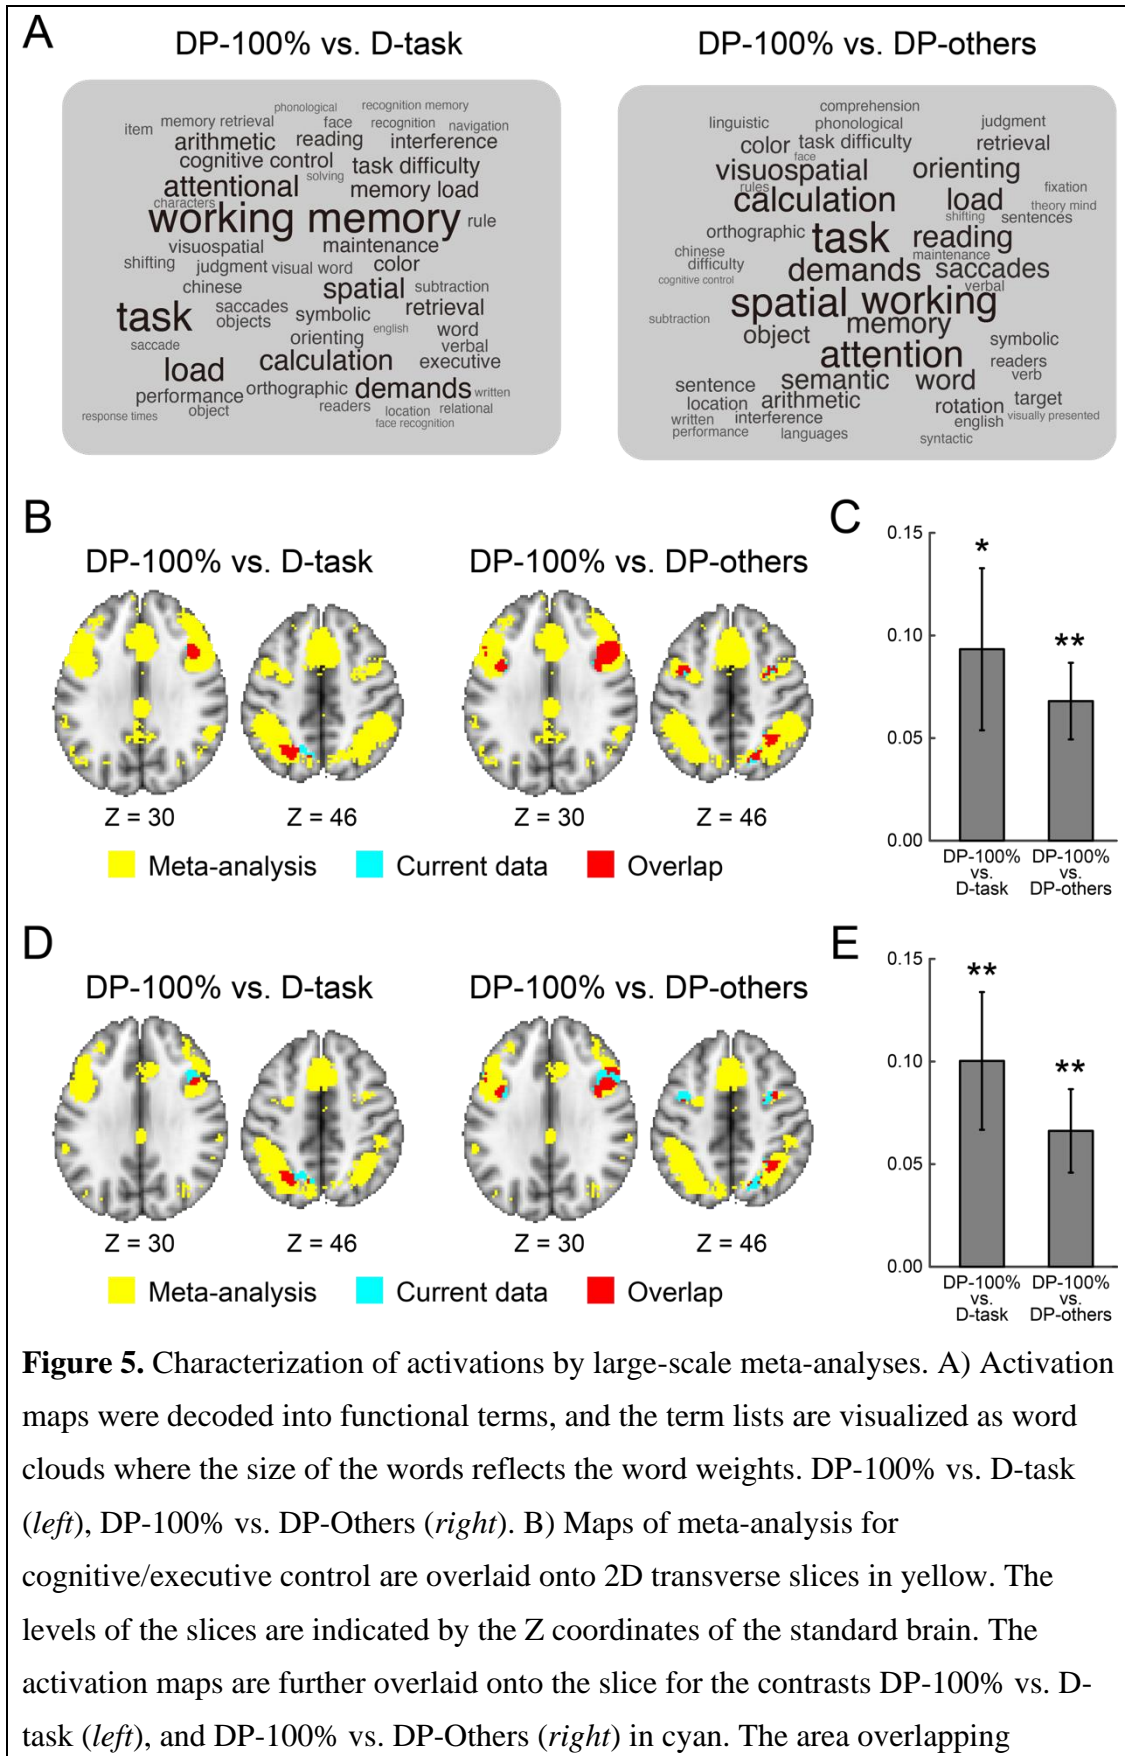

1 between the meta-analysis maps and contrast maps are colored in red. C) Region of  
2 Interest (ROI) analysis. ROI was defined based on the meta-analysis maps in panel  
3 B, and signal magnitudes of the contrasts DP-100% vs. D-task and DP-100% vs. DP-  
4 Others were calculated within the ROI. Error bars indicate standard errors of the  
5 mean across participants. \*:  $P < 0.05$ ; \*\*:  $P < 0.01$ . D) Maps of the meta-analysis for  
6 switching are overlaid onto 2D transverse slice in yellow. Other formats are identical  
7 to those in panel B. D) ROI analysis. ROIs were defined based on the meta-analysis  
8 maps in panel D, and other formats were identical to those in panel C.

9  
10 Based on the involvement of cognitive control in DP-task, we made an *a*  
11 *posteriori* hypothesis that the paradoxical elongation of reaction time in 100%  
12 conditions in DP-task (Fig. 3A) is associated with the cost for strategy switching  
13 (Sakai, 2008). Indeed, the meta-analysis map of switching (Fig. 5D, left) was similar  
14 to that of cognitive/executive control (Fig. 5B), which is reasonable because  
15 switching is an executive function implicated in fronto-parietal mechanisms (Kim et  
16 al., 2012). ROI analysis for the meta-analysis maps also revealed significant  
17 activation during the 100% trials [Fig. 5E; DP-100% vs. D-task:  $t(24) = 2.9$ ,  $P <$   
18  $0.01$ ; DP-100% vs. DP-others:  $t(24) = 3.2$ ;  $P < 0.01$ ]. Again, within this ROI, a  
19 significant difference was not observed between uncertain trials (40% and 70%) and  
20 relative to uncertain trials (10%) [ $t(24) = -0.99$ ,  $P = 0.33$ ]. Consistent results were  
21 obtained by using meta-analysis maps based on a more conservative testing  
22 procedure (Yarkoni et al., 2011)(Fig. S3).

23 If strategy switching explains the elongation of reaction time in the trials  
24 with 100% Odds in the DP-task, then strategy switching must have taken place  
25 within the DP-task, between 100% and other probability conditions. In line with this  
26 assumption, comparing 100% probability conditions and the other conditions in DP-  
27 task revealed brain activations in pIFC and SPL (Fig. 6A and Table S7). However,  
28 such a significant difference was not observed between uncertain trials (40% and  
29 70%) and more certain trials (10% trials), whereas reaction times differed between  
30 these conditions.

31 In contrast, no significant brain activation was observed in the comparison  
32 between without delay conditions (“When” = “Now”) and the other conditions in  
33 DP-task (Fig. 6B). Furthermore, the meta-analysis map almost included the

1 activation location during trials with 100% Odds relative to trials with other  
 2 probabilities in DP-task (Fig. 5D, right). Thus, the meta-analysis provided support  
 3 for the (*a posteriori*) hypothesis that participants switched strategy between 100%  
 4 Odds and the other probability conditions in DP-task.  
 5

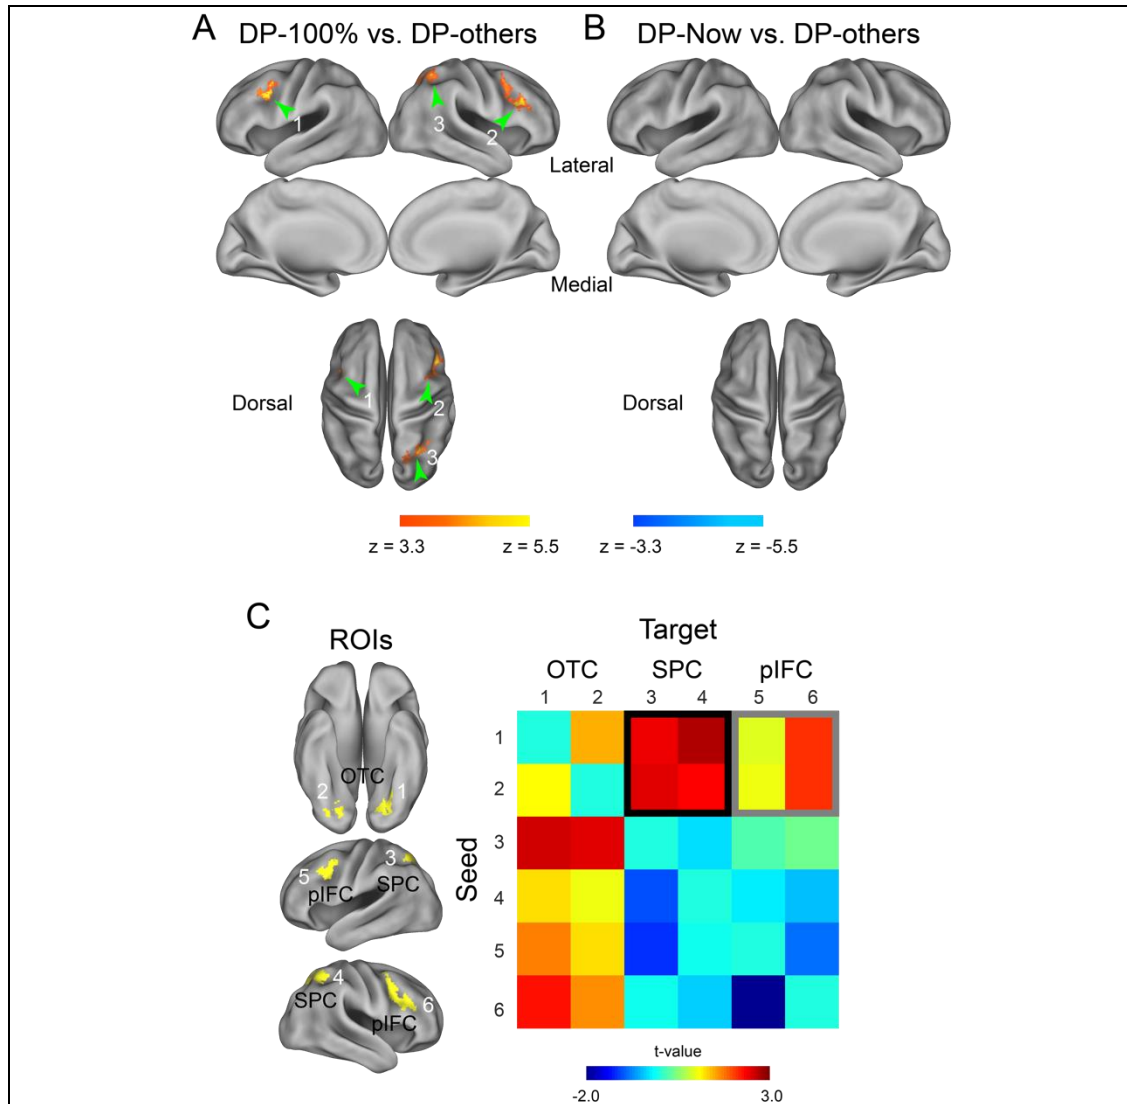

6  
 7 **Figure 6.** Functional interaction of brain regions related to the specific processing of  
 8 100% Odds in DP-task. A) Statistical activation maps of brain regions showing  
 9 greater activity in 100% Odds (warm colors) relative to the other Odds (cool colors)  
 10 in DP-task. 1/2: lateral prefrontal cortex; 3: superior parietal cortex. B) Statistical  
 11 activation maps of brain regions showing greater activity in Now (hot) relative the  
 12 other delays (cool) in DP-task. C) Psychophysiological interaction (PPI) analysis  
 13 among activations related to the probability processing. Regions of interest were



1 defined in occipitotemporal cortex (OTC: 1/2), superior parietal cortex (SPC: 3/4),  
2 and posterior inferior frontal cortex (pIFC: 5/6) (*left*). PPI Magnitudes in trials  
3 without probabilistic uncertainty (100%) in DP-task relative to trials in D-task were  
4 color-coded in a heat map with each cell indicating PPI between seed (row) and  
5 target (column) ROIs. Black and gray squares indicate PPIs with  $P < 0.05$   
6 (corrected), and  $P < 0.05$  (uncorrected), respectively.

7 To ensure the functional interactions among these brain regions during  
8 strategic multifactor decision-making, we conducted psychophysiological analysis  
9 (PPI) (Friston et al., 1997) using six areas specifically recruited in DP-task relative to  
10 D-task (Fig. 6C). Compared with D-task, DP-task resulted in significantly positive  
11 PPI from OTC and SPC [ $t(24) = 3.08$ ,  $P < 0.05$ , corrected], and PPI from OTC to  
12 pLPFC failed to survive the multiple comparisons, but were almost significant [ $t(24)$   
13  $= 2.11$ ,  $P < 0.05$ , uncorrected]. These results suggest that the explicit presentation of  
14 “100%” probability to the participant activated OTC, and this in turn activated pIFC  
15 and SPC to execute strategy switching. Taken together, the results of behavior and  
16 functional imaging collectively suggest that the participants used multiple strategies  
17 to handle probabilistic uncertainty, but not delay, in a cognitively demanding DP-  
18 task.

## 1 **Discussion**

2           In this study, we investigated the role of executive control mechanisms in a  
3 cognitively demanding gambling task in which participants were required to  
4 simultaneously consider two independent factors that modulate the value of the  
5 offers, namely probability and delay. Relative to control tasks, explicit processing of  
6 probability, but not delay, in the delayed gambling task (DP-task) biased the  
7 participants' decisions. In the DP-task, reaction time was increased in 100% Odds  
8 conditions relative to the other Odds conditions. Neuroimaging analyses were then  
9 conducted to understand these behavioral results. Explicit processing of probability,  
10 but not delay, in DP-task resulted in brain-wide activations in the frontal, parietal,  
11 and occipitotemporal areas. The pattern of brain activations implicated the  
12 involvement of executive control, in particular strategy switching, which could  
13 explain the elongation of reaction time in the multifactor task. Relative to the  
14 cognitively less demanding single-factor control task (D-task and P-task), the DP-  
15 task upregulated functional connectivity between OCT to pIFC and OCT to SPC,  
16 consistent with the brain-wide state-reconfiguration associated with the strategy  
17 switching. Taken together, these results suggest that in cognitively demanding,  
18 multifactor decision-making tasks, the executive control mechanism implicated in  
19 fronto-parietal regions plays a key role in handling cognitively burdensome factors  
20 such as probability.

21           In DP-task as well as in the two control tasks, probability and delay both  
22 affected the participant's accept rate. The change in accept rate most likely reflected  
23 a change in the subjective value of the offers. In both DP-task and D-task, the accept  
24 rate decreased significantly as the delay increased, consistent with delay discounting  
25 of subjective value in behavioral economics (Ainslie, 2005; Frederick et al., 2002b;  
26 Green et al., 1981; Green et al., 1994; Green et al., 1999; Kirby, 1997; Mischel et al.,  
27 1989; Rachlin et al., 1991). Similarly, in both the DP-task and the P-task, an increase  
28 in the probability to obtain the reward resulted in an increase of the accept rate,  
29 consistent with probability discounting of subjective values (Camerer, 1995; Green  
30 and Myerson, 2004; Kahneman and Tversky, 1979; Ostaszewski et al., 1998; Rachlin  
31 et al., 1991; Starmer, 2000; Tversky and Kahneman, 1992). Furthermore, the present  
32 results confirm previous findings that delay discounting and probability discounting  
33 simultaneously and jointly affect decision-making behavior when the two factors are

1 present (Blackburn and El-Deredy, 2013; Vanderveldt et al., 2015). The consistency  
2 with previous studies also confirms that the participants performed value-based  
3 decision-making both in the DP-task and the two control tasks. Furthermore, we  
4 confirmed previous reports that the behavioral effect of probability is larger than that  
5 of delay (Blackburn and El-Deredy, 2013; Vanderveldt et al., 2015), corroborating  
6 the notion that humans do not simply add multiple factors when performing a  
7 complex value-based decision-making task. Larger and more widespread brain  
8 activations for processing probability relative to processing delay (Fig. S2A-B) are  
9 also in line with this notion. It remains unclear whether the larger activation related  
10 to probability is a “cause” or “consequence” of the asymmetric processing of  
11 probability and delay. Further research is needed to address this point.

12         A key difference between previous behavioral economics studies and the  
13 present study is that we used decoding of neuroimaging results to suggest potentially  
14 relevant mental function related to the effects of the presence of multiple factors in  
15 value-based decision-making. Previous studies in cognitive psychology have  
16 reported that humans use different cognitive strategies to solve cognitively  
17 demanding tasks vs. cognitively less demanding tasks (Payne et al., 1963). For  
18 example, when faced with cognitively demanding decision-making tasks, human  
19 participants do not treat all available information equally; instead, they use a  
20 heuristic to prioritize and take into account only a subset of information (Brandstätter  
21 et al., 2006). Such phenomena are not only observed in laboratory experiments but  
22 are also commonly seen in real-life situations (Galotti, 2007). However, although  
23 value-based decision-making in real-life often needs to take into account multiple  
24 variables (*e.g.*, investments), there has been little exploration of cognitive  
25 psychological aspects of the presence of multiple factors in value-based decision  
26 making. In the present study, by comparing multi- and single-factor decision-making  
27 tasks in a controlled manner, we found modulations of the participants’ decision-  
28 making behaviors that could not be explained by probability discounting or delay  
29 discounting (Festinger, 1954; Keeney, 2010; Rangel et al., 2008; Vanderveldt et al.,  
30 2015). Of note, the change in accept rate (Fig. 2) was similar or even larger  
31 compared with probability discounting or delay discounting. Thus, cognitive  
32 psychological effects may influence value-based decision-making in real-life as  
33 strongly as key factors discovered in behavioral economics.

1           It is possible to argue that the change in accept rate seen in the DP-task  
2 was due to the structure of the block design used in the present study (Fig. 1B).  
3 Accept rate is a function of subjective value that is not absolute but depends on a  
4 reference point that is determined based on the current expectation for gain (Abeler  
5 et al., 2011). In the D-task block, all the trials had 100% Odds. In contrast, in the DP-  
6 task block, only a subset of trials had 100% Odds. This design made the subset of  
7 trials in the DP-task with 100% Odds have larger subjective values than the rest of  
8 the trials in the same block. Thus, if the reference point is created within each block,  
9 the subjective value of trials with 100% Odds in a DP-task may be higher than the  
10 trials in a D-task, which in turn, causes a higher accept rate in DP-task. However,  
11 this explanation is unlikely because accept rates did not change between the DP-task  
12 with an immediate outcome (*i.e.*, “When” = “Now”) and the P-task, even though the  
13 accept rate should increase in the latter condition if this explanation were true. Thus,  
14 the task design is unlikely to affect the change in accept rate due to the number of  
15 factors observed in the present study.

16           The explicit processing of 100% Odds in the DP-task may engage the  
17 certainty effect (Tversky and Kahneman, 1986). Typical behavioral tasks related to  
18 the certainty effect are presented with two options: "winning \$30 with 100%  
19 certainty" and "winning \$45 with 80% certainty and winning nothing for 20%  
20 certainty." Participants typically chose the former option despite its lower expected  
21 value, suggesting that the certainty for reward acquisition increased the subjective  
22 value. However, because the two conditions in DP-task and D-task compared in the  
23 present study both had 100% Odds, the present observation was not an effect of  
24 unequal weighting to 100% Odds relative to the other probabilities. Moreover, the  
25 increase of reaction time despite the decrease in uncertainty in DP-tasks with 100%  
26 Odds cannot be explained by the certainty effect alone. Taken together, the certainty  
27 effect alone is unlikely to explain the modulation of decision-making behaviors in  
28 the DP-task.

29           Motivation to obtain the reward is an important factor determining value-  
30 based decision behaviors that was not explicitly manipulated in our study. Using a  
31 multifactor, value-based decision-making task in which effort and probability to  
32 obtain reward were simultaneously manipulated (effort expenditure for reward task,  
33 EEfRT; Treadway et al., 2009), Treadway and colleagues found that human subjects

1 with weaker motivation for reward tend to choose an option with smaller reward and  
2 smaller required effort over an option with larger reward and larger required effort.  
3 Such (negative) correlation is present when the probability of winning is low, but is  
4 largely abolished when the probability is high. In contrast, in our study, we observed  
5 delay discounting regardless of the probability to obtain the reward (Fig. 2),  
6 suggesting that the cost associated with acceptance or rejection of offers was largely  
7 constant to the participants. Although we believe that this task condition was  
8 beneficial for isolating fMRI activity related to the processing of probability and  
9 delay *per se*, the downside was that we were unable to measure whether and how  
10 effort, and hence reward motivation, could have modulated the decision-making  
11 behaviors in our task. Rather than combining probability, delay, and effort in a single  
12 task, however, one can conduct a complex value-based decision task (e.g., DP-task)  
13 and EEfRT in separate sessions with the same participants to quantify reward  
14 motivation in individual participants (Giustiani et al., 2020). Such measurement is  
15 not only important for understanding the effect of individual personality on complex  
16 value-based decision-making but also for understanding how human participants  
17 with psychiatric disorders might respond to complex value-based decision tasks.  
18 Reward motivation strongly modulates decision-making behaviors of human  
19 participants with psychiatric disorders such as schizophrenia (Green et al., 2015;  
20 Huang et al., 2016). Thus, quantification of reward motivation would be  
21 indispensable to understand behaviors of participants with psychiatric disorders in  
22 complex value-based decision tasks.

23 Brain activity in the frontal and parietal regions related to the acceptance of  
24 gambles is consistent with previous results that brain activity increases in the frontal  
25 and parietal regions when expectations for rewards are high (Fig. S2C) (Hare et al.,  
26 2008; Rolls, 2000; Tom et al., 2007). The frontal and parietal activations related to  
27 the increase in probability can also be explained by the higher expectations for  
28 rewards. It should be noted that we did not detect significant activation in the  
29 orbitofrontal cortex (OFC), which is known as a brain region related to subjective  
30 value (Kable and Glimcher, 2007; Levy and Glimcher, 2012). This is most likely due  
31 to the fact that the present tasks were not designed to isolate the effect of subjective  
32 value (Jimura et al., 2011). Brain activity in the OFC increased due to the increase in  
33 the DP-task relative to the control tasks. Given that the region corresponds to early

1 visual areas, the activation in the OTC most likely reflects additional visual  
2 processing due to the increased number of visual stimuli relative to the control tasks  
3 (Fig. 1A) (Mentis et al., 1997; Zeki, 1978).

4         Explicit processing of probability in the DP-task activated the pIFC, SPC,  
5 and OTC relative to the D-task. Activation in the OTC likely reflects an increase in  
6 visual information processing, as described above. The present meta-analyses  
7 revealed that activations in pIFC and SPC overlapped with brain regions previously  
8 implicated for strategy switching (Konishi et al., 2002; Sakai and Passingham, 2006).  
9 This pattern of brain activation suggested an interpretation that the participants  
10 switched their decision-making strategy to handle a subset of conditions (*i.e.*  
11 conditions with 100% Odds) in a cognitively demanding DP-task. In fact, pIFC and  
12 SPC were similarly activated in the 100% Odds conditions in DP-task relative to the  
13 other Odds conditions in DP-task. Consistently, the reaction time for 100% Odds  
14 tended to be longer than other Odds, likely reflecting the switching cost (Rogers and  
15 Monsell, 1995) associated with the shift in strategy between 100% Odds and the  
16 other Odds. It is intriguing that strategy switching did not seem to occur in the 10%  
17 Odds conditions, which also had a low probabilistic uncertainty. The differential  
18 processing of 100% and 10% Odds conditions may reflect the certainty effect  
19 (Tversky and Kahneman, 1986). It is of great interest which strategies the  
20 participants were switching between. Notably, a recent large-scale study reported  
21 that human participants frequently adopted flexible decisions that switched between  
22 subjective value-based decisions and expected utility-based decisions (Peterson et  
23 al., 2021). We speculate that the participants in the present study adopted similar  
24 flexible decisions during DP-task.

25         The decoding of functional maps showed strong weights for the terms  
26 related to cognitive/executive control including working memory and switching (Fig  
27 5A). Working memory is a representative executive (cognitive) control function that  
28 refers to active maintenance and updating of goal-relevant information (D'Esposito  
29 and Postle 2015). Switching is also a representative executive control function,  
30 specifying shifting between one engagement to another. Thus, as executive control  
31 functions, switching and working memory partially share functional constructs, and  
32 indeed, it is well-known that cortical involvements in working memory and  
33 switching overlap in broad fronto-parietal regions (Dosenbach et al. 2006).

1 Importantly, the decoder that we used to create the word cloud (Yarkoni et al. 2011)  
2 calculated association weights between activation maps and terms based on  
3 topographical similarity between the maps and meta-analysis maps related to the  
4 terms. Therefore, it is reasonable that both task (switch) and working memory shows  
5 strong weights.

6         Given the topographical similarity of brain regions involved in working  
7 memory and switching, theoretical accounts of these functions may help to specify  
8 cognitive processing in the current task. Working memory helps to guide decisions  
9 by encoding, maintaining, and integrating choice information. It has also been  
10 suggested that engagements of working memory are especially helpful for difficult  
11 decision-making in which choice information needs to be evaluated elaborately  
12 (Jimura et al. 2018). On the other hand, in the current study, we examined brain  
13 activity during decision-making, but comparisons were made based on logically  
14 equivalent situations (DP-100% and D-task trials) and easier situations (DP-100%  
15 vs. DP-others trials). Thus, working memory functioning is subtracted out in our  
16 comparisons for the DP-100% trials, and it is possible to interpret our activation  
17 results as not directly reflective of working memory.

18         Switching from one task to another requires cognitive processing to release  
19 a set of task rules and implement another set. Despite easier decision situations,  
20 prolonged reaction times in DP-100% are indicative of strategy switching. More  
21 importantly, our behavioral results suggest a switch of strategy when the DP-100%  
22 trials were performed. Taken together, this collective behavioral evidence and  
23 theoretical accounts suggest that switching may be more suitable to explain cognitive  
24 processing specifically involved in the DP-100% trials.

25         PPI analysis revealed increased functional connectivity from the OTC to  
26 pIFC and OTC to SPC in DP-task, with 100% Odds relative to D-task. Similarly, a  
27 small but significant negative change of functional connectivity was found from the  
28 pIFC to SPC. The location of pIFC activation in the present study is close to the site  
29 in pIFC implicated for feedback processing but not the site in pIFC implicated for  
30 response inhibition (Hirose et al., 2009). Thus, activations in the pIFC and SPC in  
31 the present study may represent different cognitive components involved in strategy  
32 switching (Crone et al., 2006; Derrfuss et al., 2005; Yeung et al., 2006).

1           It should be noted that the present conclusion related to strategy switching  
2 is based on the *a posteriori* hypothesis which was derived from the behavioral results  
3 that the reaction time was elongated in DP-100%. The *a posteriori* hypothesis was  
4 examined in order to provide a possible interpretation that could comprehensively  
5 explain the counterintuitive behavioral results together with brain activations.  
6 Although the test of a post-hoc hypothesis in general has a risk of reverse inference  
7 (Krajbich et al., 2015; Poldrack, 2006; Poldrack and Yarkoni, 2016), we took great  
8 care to avoid misinterpretations related to reverse inference. First, we carefully  
9 compared the present behavioral results with previous literature to make sure that the  
10 difference in reaction time between DP-task and the control task (from which we  
11 derived the *a posteriori* hypothesis) is unlikely to be an artifact of the task structure.  
12 Krajbich and colleagues suggested that reaction time effects in behavioral  
13 economics experiments could artifactually arise simply from the fact that reaction  
14 time is expected to be longer when utilities for accept and reject are close to each  
15 other (Krajbich et al., 2015). In the present DP-task, we observed that reaction time  
16 was elongated in 100% Odds, despite the fact that the condition was designed to  
17 have the maximum difference of utility between accept and reject relative to other  
18 conditions. In contrast, reaction time in the control task showed short reaction time  
19 for 100% Odds relative to other conditions such as 40% and 70% Odds, consistent  
20 with the idea that a larger difference of the utility resulted in a faster reaction time  
21 (Fig. 3B). Second, we closely adhered to a recommendation that a reverse inference  
22 based on one data modality should be checked and verified by another data modality  
23 (Poldrack, 2006). According to this recommendation, the hypothesis of strategy  
24 switching which was derived from the behavioral data was tested on neuroimaging  
25 data. For the analysis of neuroimaging data, we employed a well-established and  
26 stringent large-scale, automated meta-analyses based on Neurosynth (Yarkoni et al.,  
27 2011). Furthermore, in addition to the stringent meta-analysis, we conducted PPI to  
28 confirm that brain activities were coordinated during DP-task, as described above.  
29 Taken together, we consider that the present conclusion is not affected by common  
30 pitfalls related to the use of reverse inference. Nevertheless, we are aware that these  
31 arguments do not fully eliminate the risk, and thus care needs to be taken to interpret  
32 the results related to the *a posteriori* hypothesis. Future studies using brain  
33 stimulation (Hill et al., 2017) or lesion studies (Noonan et al., 2017) are needed to



1 further establish the involvement of strategy switching in complex value-based  
2 decision-making.

3           In the current task, participants made choices in hypothetical situations,  
4 which could affect affects participants' seriousness and engagement with the task  
5 and which could be reflected in the current imaging results. However, when  
6 collecting data in a laboratory experiment where participants make choices based on  
7 the amount of monetary reward and years of delay to receive choice outcomes,  
8 hypothetical situations would be inevitable. Indeed, previous studies of value-based  
9 decision-making have used hypothetical situations when presenting rewards delayed  
10 by years (e.g., Rachlin et al., 1999; Green et al. 1994, 1999; Vanderveldt et al. 2015,  
11 Jimura et al. 2018).

12           To address this issue, some studies provided choice outcomes by randomly  
13 choosing from the trials, and participants received a payment after specified delay  
14 (e.g., Kable and Glimcher 2007). However, it is possible that such randomly chosen  
15 real outcomes might distort their engagements; participants would be engaged more  
16 in the trials where it was more realistic to receive money from the experimenter  
17 through the presented choice. We wished to circumvent this potential distortion in  
18 the current study.

19           Behaviorally, we obtained reasonable results of accept rates, consistent  
20 with a prior study (Tom et al. 2007), which assured that participants appropriately  
21 performed the task. Nonetheless, due to the nature of the hypothetical situations, the  
22 neural effects in our experiment might be weaker than those in the real choice.

1    **Acknowledgements**

2    This study was supported by JSPS Kakenhi, 26350986, 26120711, 17H05957,  
3    17K01989 to KJ, 17H00891 to KN; 20H00521 to MT; 19K16252, 20H05052 and  
4    21H0516513 to TM; a grant from Brain/MINDS Beyond (AMED) to TM (grant  
5    number JP20dm0307031); a grant from JST-PRESTO to TM; a grant from Uehara  
6    Memorial Foundation to KJ; a grant from Takeda Science Foundation to KJ and MT;  
7    Keio Gijuku Academic Development Funds to KJ; and a grant from Keio Leading-  
8    edge Laboratory of Science and Technology to KJ. We thank Maoko Yamanaka for  
9    administrative assistance. We also thank Satoshi Hirano for technical assistance.

10

11    **Data and code availability statement**

12    The originally collected data and developed scripts will be publicly available upon  
13    the publication of the current study via public repository.

14

## 1 **References**

- 2 Abeler, J., Falk, A., Goette, L., and Huffman, D. (2011). Reference points and effort  
3 provision. *American Economic Review* *101*, 470-492.
- 4 Ainslie, G. (2005). Précis of Breakdown of Will. *Behav Brain Sci* *28*, 635-650;  
5 discussion 650-673.
- 6 Basten, U., Biele, G., Heekeren, H.R., and Fiebach, C.J. (2010). How the brain  
7 integrates costs and benefits during decision making. *Proc Natl Acad Sci U S*  
8 *A* *107*, 21767-21772.
- 9 Bestmann, S., Harrison, L.M., Blankenburg, F., Mars, R.B., Haggard, P., Friston,  
10 K.J., and Rothwell, J.C. (2008). Influence of uncertainty and surprise on  
11 human corticospinal excitability during preparation for action. *Curr Biol* *18*,  
12 775-780.
- 13 Blackburn, M., and El-Deredy, W. (2013). The future is risky: discounting of  
14 delayed and uncertain outcomes. *Behav Processes* *94*, 9-18.
- 15 Brandstätter, E., Gigerenzer, G., and Hertwig, R. (2006). The priority heuristic:  
16 making choices without trade-offs. *Psychol Rev* *113*, 409-432.
- 17 Camerer, C. (1995). *Individual decision making*. (Princeton, NJ: Princeton  
18 University Press).
- 19 Camilleri, J.A., Müller, V.I., Fox, P., Laird, A.R., Hoffstaedter, F., Kalenscher, T.,  
20 and Eickhoff, S.B. (2018). Definition and characterization of an extended  
21 multiple-demand network. *Neuroimage* *165*, 138-147.
- 22 Chernev, A. (2003). Product assortment and individual decision processes. *J Pers*  
23 *Soc Psychol* *85*, 151-162.
- 24 Cocuzza, C.V., Ito, T., Schultz, D., Bassett, D.S., and Cole, M.W. (2020). Flexible  
25 Coordinator and Switcher Hubs for Adaptive Task Control. *J Neurosci* *40*,  
26 6949-6968.
- 27 Corbetta, M., and Shulman, G.L. (2002). Control of goal-directed and stimulus-  
28 driven attention in the brain. *Nat Rev Neurosci* *3*, 201-215.
- 29 Crone, E.A., Wendelken, C., Donohue, S.E., and Bunge, S.A. (2006). Neural  
30 evidence for dissociable components of task-switching. *Cereb Cortex* *16*,  
31 475-486.
- 32 D'Esposito, M., and Postle, B.R. (2015). The cognitive neuroscience of working  
33 memory. *Annu Rev Psychol* *66*, 115-142.

- 1 Daw, N.D., O'Doherty, J.P., Dayan, P., Seymour, B., and Dolan, R.J. (2006).  
2 Cortical substrates for exploratory decisions in humans. *Nature* 441, 876-879.
- 3 Derrfuss, J., Brass, M., Neumann, J., and von Cramon, D.Y. (2005). Involvement of  
4 the inferior frontal junction in cognitive control: meta-analyses of switching  
5 and Stroop studies. *Hum Brain Mapp* 25, 22-34.
- 6 Dosenbach, N.U., Visscher, K.M., Palmer, E.D., Miezin, F.M., Wenger, K.K., Kang,  
7 H.C., Burgund, E.D., Grimes, A.L., Schlaggar, B.L., and Petersen, S.E.  
8 (2006). A core system for the implementation of task sets. *Neuron* 50, 799-  
9 812.
- 10 Eklund, A., Nichols, T.E., and Knutsson, H. (2016). Cluster failure: Why fMRI  
11 inferences for spatial extent have inflated false-positive rates. *Proc Natl Acad*  
12 *Sci U S A* 113, 7900-7905.
- 13 Festinger, L. (1954). A theory of social comparison processes. *Human Relations* 7,  
14 117-140.
- 15 Frederick, S., Loewenstein, G., and O'Donoghue, T. (2002a). Time  
16 discounting and time preference: A critical review. *Journal of Economic Literature*  
17 40, 351-401.
- 18 Frederick, S., Loewenstein, G., and O'Donoghue, T. (2002b). Time discounting and  
19 time preference: A critical review. *Journal of Economic Literature* 40, 351-  
20 401.
- 21 Friston, K.J., Buechel, C., Fink, G.R., Morris, J., Rolls, E., and Dolan, R.J. (1997).  
22 Psychophysiological and modulatory interactions in neuroimaging.  
23 *Neuroimage* 6, 218-229.
- 24 Galotti, K.M. (2007). Decision structuring in important real-life choices. *Psychol Sci*  
25 18, 320-325.
- 26 Green, L., Fisher, E.B., Perlow, S., and Sherman, L. (1981). Preference reversal and  
27 self-control: Choice as a  
28 function of reward amount and delay. *Behaviour Analysis Letters* 1, 43-51.
- 29 Green, L., Fry, A.F., and Myerson, J. (1994). Discounting of delayed rewards: A life-  
30 span comparison. *Psychological Science* 5, 33-36.
- 31 Green, L., and Myerson, J. (2004). A discounting framework for choice with delayed  
32 and probabilistic rewards. *Psychol Bull* 130, 769-792.

- 1 Green, L., Myerson, J., and O'Donoghue, P. (1999). Discounting of delayed rewards  
2 across the life span: age differences in individual discounting functions.  
3 *Behav Processes* 46, 89-96.
- 4 Green, L., Myerson, J., and Vanderveldt, A. (2014). *Delay and probability*  
5 *discounting* (Hoboken, NJ: Wiley-Blackwell).
- 6 Hare, T.A., O'Doherty, J., Camerer, C.F., Schultz, W., and Rangel, A. (2008).  
7 Dissociating the role of the orbitofrontal cortex and the striatum in the  
8 computation of goal values and prediction errors. *J Neurosci* 28, 5623-5630.
- 9 Hill, C.A., Suzuki, S., Polania, R., Moisa, M., O'Doherty, J.P., and Ruff, C.C.  
10 (2017). A causal account of the brain network computations underlying  
11 strategic social behavior. *Nat Neurosci* 20, 1142-1149.
- 12 Hirose, S., Chikazoe, J., Jimura, K., Yamashita, K., Miyashita, Y., and Konishi, S.  
13 (2009). Sub-centimeter scale functional organization in human inferior frontal  
14 gyrus. *Neuroimage* 47, 442-450.
- 15 Jimura, K., Chushak, M.S., Westbrook, A., and Braver, T.S. (2018). Intertemporal  
16 Decision-Making Involves Prefrontal Control Mechanisms Associated with  
17 Working Memory. *Cereb Cortex* 28, 1105-1116.
- 18 Jimura, K., Myerson, J., Hilgard, J., Keighley, J., Braver, T.S., and Green, L. (2011).  
19 Domain independence and stability in young and older adults' discounting of  
20 delayed rewards. *Behav Processes* 87, 253-259.
- 21 Kable, J.W., and Glimcher, P.W. (2007). The neural correlates of subjective value  
22 during intertemporal choice. *Nat Neurosci* 10, 1625-1633.
- 23 Kahneman, D. (2011). *Thinking, Fast and Slow*. (London: Macmillan).
- 24 Kahneman, D., and Tversky, A. (1979). Prospect theory: An analysis of decision  
25 under risk. *Econometrica* 43, 263-291.
- 26 Keeney, R.L. (2010). *Value-Focused Thinking: A Path to Creative Decisionmaking*  
27 (Cambridge, MA: Harvard University Press).
- 28 Kim, C., Cilles, S.E., Johnson, N.F., and Gold, B.T. (2012). Domain general and  
29 domain preferential brain regions associated with different types of task  
30 switching: a meta-analysis. *Hum Brain Mapp* 33, 130-142.
- 31 Kirby, K.N. (1997). Bidding on the future: Evidence against normative  
32 discounting of delayed rewards. *Journal of Experimental Psychology: General* 126,  
33 54-70.

- 1 Konishi, S., Hayashi, T., Uchida, I., Kikyo, H., Takahashi, E., and Miyashita, Y.  
2 (2002). Hemispheric asymmetry in human lateral prefrontal cortex during  
3 cognitive set shifting. *Proc Natl Acad Sci U S A* 99, 7803-7808.
- 4 Krajbich, I., Bartling, B., Hare, T., and Fehr, E. (2015). Rethinking fast and slow  
5 based on a critique of reaction-time reverse inference. *Nat Commun* 6, 7455.
- 6 Levy, D.J., and Glimcher, P.W. (2012). The root of all value: a neural common  
7 currency for choice. *Curr Opin Neurobiol* 22, 1027-1038.
- 8 McClure, S.M., Ericson, K.M., Laibson, D.I., Loewenstein, G., and Cohen, J.D.  
9 (2007). Time discounting for primary rewards. *J Neurosci* 27, 5796-5804.
- 10 McClure, S.M., Laibson, D.I., Loewenstein, G., and Cohen, J.D. (2004). Separate  
11 neural systems value immediate and delayed monetary rewards. *Science* 306,  
12 503-507.
- 13 McGuire, J.T., and Botvinick, M.M. (2010). Prefrontal cortex, cognitive control, and  
14 the registration of decision costs. *Proc Natl Acad Sci U S A* 107, 7922-7926.
- 15 Mentis, M.J., Alexander, G.E., Grady, C.L., Horwitz, B., Krasuski, J., Pietrini, P.,  
16 Strassburger, T., Hampel, H., Schapiro, M.B., and Rapoport, S.I. (1997).  
17 Frequency variation of a pattern-flash visual stimulus during PET  
18 differentially activates brain from striate through frontal cortex. *Neuroimage*  
19 5, 116-128.
- 20 Miller, E.K., and Cohen, J.D. (2001). An integrative theory of prefrontal cortex  
21 function. *Annu Rev Neurosci* 24, 167-202.
- 22 Mischel, W., Shoda, Y., and Rodriguez, M.I. (1989). Delay of gratification in  
23 children. *Science* 244, 933-938.
- 24 Misonou, A., and Jimura, K. (2021). Prefrontal-striatal mechanisms of behavioral  
25 impulsivity during consumption of delayed real liquid rewards. *Front. Behav.*  
26 *Neurosci. fnbeh.2021.749252*
- 27 Myerson, J., and Green, L. (1995). Discounting of delayed rewards: Models of  
28 individual choice. *J Exp Anal Behav* 64, 263-276.
- 29 Noonan, M.P., Chau, B.K.H., Rushworth, M.F.S., and Fellows, L.K. (2017).  
30 Contrasting Effects of Medial and Lateral Orbitofrontal Cortex Lesions on  
31 Credit Assignment and Decision-Making in Humans. *J Neurosci* 37, 7023-  
32 7035.

- 1 Ostaszewski, P., Green, L., and Myerson, J. (1998). Effects of inflation on the  
2 subjective value of delayed and probabilistic rewards. *Psychonomic Bulletin*  
3 *& Review* 5, 324-333.
- 4 Payne, J.W., Bettman, J.R., and Johnson, E.J. (1963). *The adaptive decision maker.*  
5 (Cambridge: Cambridge University Press).
- 6 Poldrack, R.A. (2006). Can cognitive processes be inferred from neuroimaging data?  
7 *Trends Cogn Sci* 10, 59-63.
- 8 Poldrack, R.A., and Yarkoni, T. (2016). From Brain Maps to Cognitive Ontologies:  
9 Informatics and the Search for Mental Structure. *Annu Rev Psychol* 67, 587-  
10 612.
- 11 Rachlin, H., Raineri, A., and Cross, D. (1991). Subjective probability and delay.  
12 *Journal of the Experimental Analysis of Behavior* 55, 233-244.
- 13 Rangel, A., Camerer, C., and Montague, P.R. (2008). A framework for studying the  
14 neurobiology of value-based decision making. *Nat Rev Neurosci* 9, 545-556.
- 15 Rogers, R.D., and Monsell, S. (1995). Cost of a predictable switch between simple  
16 cognitive tasks. *Journal of Experimental Psychology: General* 124, 207-231.
- 17 Rolls, E.T. (2000). The orbitofrontal cortex and reward. *Cereb Cortex* 10, 284-294.
- 18 Sakai, K. (2008). Task set and prefrontal cortex. *Annu Rev Neurosci* 31, 219-245.
- 19 Sakai, K., and Passingham, R.E. (2006). Prefrontal set activity predicts rule-specific  
20 neural processing during subsequent cognitive performance. *J Neurosci* 26,  
21 1211-1218.
- 22 Simonson, I., and Tversky, A. (1992). Choice in context: Tradeoff contrast and  
23 extremeness aversion. *Journal of Marketing Research* 29, 281-295.
- 24 Smith, V.L., and Walker, J.M. (1993). Monetary rewards and decision cost in  
25 experimental economics. *Economic Inquiry* 31, 245-261.
- 26 Starmer, C. (2000). Developments in non-expected utility theory: The  
27 hunt for a descriptive of choice under risk. *Journal of Economic Literature* 38, 332-  
28 382.
- 29 Suzuki, S., Cross, L., and O'Doherty, J.P. (2017). Elucidating the underlying  
30 components of food valuation in the human orbitofrontal cortex. *Nat*  
31 *Neurosci* 20, 1780-1786.

- 1 Tanaka, S.C., Doya, K., Okada, G., Ueda, K., Okamoto, Y., and Yamawaki, S.  
2 (2004). Prediction of immediate and future rewards differentially recruits  
3 cortico-basal ganglia loops. *Nat Neurosci* 7, 887-893.
- 4 Tom, S.M., Fox, C.R., Trepel, C., and Poldrack, R.A. (2007). The neural basis of  
5 loss aversion in decision-making under risk. *Science* 315, 515-518.
- 6 Treisman, A. (1993). *The perception of features and objects.* (Clarendon  
7 Press/Oxford University Press).
- 8 Tversky, A., and Kahneman, D. (1974). Judgment under Uncertainty: Heuristics and  
9 Biases. *Science* 185, 1124-1131.
- 10 Tversky, A., and Kahneman, D. (1986). Rational choice and the framing of  
11 decisions. *The Journal of Business* 59, S251-S278.
- 12 Tversky, A., and Kahneman, D. (1992). Advances in prospect theory: Cumulative  
13 representation of uncertainty. *Journal of Risk and Uncertainty* 5, 297-323.
- 14 Vanderveldt, A., Green, L., and Myerson, J. (2015). Discounting of monetary  
15 rewards that are both delayed and probabilistic: delay and probability  
16 combine multiplicatively, not additively. *J Exp Psychol Learn Mem Cogn* 41,  
17 148-162.
- 18 Winkler, A.M., Ridgway, G.R., Webster, M.A., Smith, S.M., and Nichols, T.E.  
19 (2014). Permutation inference for the general linear model. *Neuroimage* 92,  
20 381-397.
- 21 Woodman, G.F., and Luck, S.J. (2004). Visual search is slowed when visuospatial  
22 working memory is occupied. *Psychon Bull Rev* 11, 269-274.
- 23 Yarkoni, T., Poldrack, R.A., Nichols, T.E., Van Essen, D.C., and Wager, T.D.  
24 (2011). Large-scale automated synthesis of human functional neuroimaging  
25 data. *Nat Methods* 8, 665-670.
- 26 Yeung, N., Nystrom, L.E., Aronson, J.A., and Cohen, J.D. (2006). Between-task  
27 competition and cognitive control in task switching. *J Neurosci* 26, 1429-  
28 1438.
- 29 Zeki, S.M. (1978). Functional specialisation in the visual cortex of the rhesus  
30 monkey. *Nature* 274, 423-428.

31  
32  
33



## 1 **Supplementary Information**

2

3 **Table S1.** Brain regions showing significant parametrical effect with probability.

4 Coordinates are listed in MNI space. Positive and negative t-values indicate increase  
5 in high and low probability, respectively. BA indicate Brodmann areas and is  
6 approximate. Cluster size is in voxels.

7

| Area             | Coordinate |     |     | t-value | BA  | Cluster |      |
|------------------|------------|-----|-----|---------|-----|---------|------|
|                  | x          | y   | z   |         |     | ID      | Size |
| Frontal          | -38        | 2   | 42  | 4.63    | 9/6 | 1       | 136  |
|                  | 10         | 32  | 56  | -6.15   | 8   | 2       | 259  |
|                  | 12         | 20  | 64  | -4.77   | 8   | 2       | 259  |
| Parietal         | 24         | -56 | 54  | 5.34    | 7   | 3       | 296  |
|                  | 16         | -64 | 58  | 4.22    | 7   | 3       | 296  |
|                  | -20        | -64 | 54  | 4.90    | 7   | 4       | 131  |
| Occipitotemporal | 46         | -60 | -8  | 5.86    | 37  | 5       | 212  |
|                  | 44         | -72 | -10 | 3.78    | 37  | 5       | 212  |

8

- 1 **Table S2.** Brain regions showing significant parametrical effect with delay duration.  
2 Positive and negative t-values indicate increase in long and short delay, respectively.  
3 Formats are similar to those in Table S1.

4

| Area     | Coordinate |     |    | t-value | BA | Cluster |      |
|----------|------------|-----|----|---------|----|---------|------|
|          | x          | y   | z  |         |    | ID      | Size |
| Temporal | -58        | -52 | 16 | -5.19   | 39 | 1       | 132  |

5

1 **Table S3.** Brain regions showing significant signal increase and decrease in the  
 2 contrast accept versus reject decisions. Positive and negative t-values indicate  
 3 increase in accept and reject decisions, respectively. Formats are similar to those in  
 4 Table S1.

5

| Area             | Coordinate |     |     | t-value | BA    | Cluster |      |
|------------------|------------|-----|-----|---------|-------|---------|------|
|                  | x          | y   | z   |         |       | ID      | Size |
| Frontal          | -42        | 0   | 40  | 5.64    | 6/9   | 1       | 142  |
|                  | 12         | 10  | 62  | -5.32   | 6     | 2       | 199  |
|                  | 14         | 22  | 62  | -5.06   | 6/8   | 2       | 199  |
| Parietal         | 22         | -62 | 48  | 5.49    | 7     | 3       | 426  |
|                  | 26         | -62 | 60  | 5.01    | 7     | 3       | 426  |
|                  | 26         | -62 | 60  | 4.96    | 7     | 3       | 426  |
|                  | 30         | -76 | 30  | 3.88    | 39    | 3       | 426  |
|                  | -28        | -74 | 28  | 4.59    | 39    | 4       | 143  |
|                  | -22        | -66 | 38  | 4.08    | 39    | 4       | 143  |
|                  | -30        | -62 | 26  | 4.01    | 39    | 4       | 143  |
|                  | -40        | -28 | 48  | -4.26   | 5     | 5       | 216  |
|                  | -28        | -38 | 60  | -5.91   | 5     | 5       | 216  |
| Occipitotemporal | -46        | -56 | -14 | 4.65    | 37    | 6       | 125  |
|                  | -60        | -50 | 0   | 4.06    | 36/37 | 6       | 125  |

6

1 **Table S4.** Brain regions showing significant signal increase and decrease between  
 2 trials with 100% Odds in DP-task and D-task trials. Positive and negative t-values  
 3 indicate increase in trials with 100% Odds and D-task trials, respectively. Formats  
 4 are similar to those in Table S1.

5

| Area             | Coordinate |     |     | t-value | BA    | Cluster |      |
|------------------|------------|-----|-----|---------|-------|---------|------|
|                  | x          | y   | z   |         |       | ID      | Size |
| Frontal          | 42         | 16  | 30  | 5.90    | 44    | 1       | 139  |
|                  | 54         | 24  | 38  | 3.85    | 8/6   | 1       | 139  |
| Parietal         | -14        | -60 | 46  | 5.29    | 7     | 2       | 231  |
|                  | -26        | -62 | 44  | 4.66    | 7     | 2       | 231  |
|                  | -6         | -68 | 42  | 3.77    | 7     | 2       | 231  |
| Occipitotemporal | -20        | -70 | -12 | 5.67    | 18    | 3       | 245  |
|                  | -32        | -72 | -10 | 5.06    | 18    | 3       | 245  |
|                  | 4          | -84 | 4   | 4.98    | 17    | 4       | 410  |
|                  | 14         | -74 | 10  | 4.65    | 17    | 4       | 410  |
|                  | -12        | -80 | 8   | 4.46    | 17    | 4       | 410  |
|                  | -4         | -66 | 6   | 4.11    | 17    | 4       | 410  |
|                  | 22         | -74 | -10 | 4.93    | 18    | 5       | 129  |
|                  | 26         | -82 | -18 | 3.77    | 18/19 | 5       | 129  |

6

1 **Table S5.** Brain regions showing significant signal increase and decrease between  
 2 trials with 100% Odds in DP-task and D-task trials. Reaction time of each trial coded  
 3 as a parametric regressor in GLM analysis to minimize general difference in  
 4 cognitive load. Positive and negative t-values indicate increase in trials with 100%  
 5 Odds and D-task trials, respectively. Formats are similar to those in Table S1.

| Area             | Coordinate |     |     | t-value | BA | Cluster |      |
|------------------|------------|-----|-----|---------|----|---------|------|
|                  | x          | y   | z   |         |    | ID      | Size |
| Frontal          | 42         | 16  | 30  | 5.84    | 44 | 1       | 130  |
| Parietal         | -14        | -60 | 46  | 4.92    | 7  | 2       | 151  |
|                  | -28        | -60 | 46  | 4.38    | 7  | 2       | 151  |
| Occipitotemporal | 22         | -74 | -10 | 7.05    | 18 | 3       | 265  |
|                  | -20        | -70 | -12 | 5.29    | 18 | 4       | 251  |
|                  | -32        | -72 | -12 | 5.12    | 18 | 4       | 251  |
|                  | 4          | -84 | 4   | 4.82    | 17 | 5       | 157  |
|                  | -12        | -82 | 8   | 4.32    | 17 | 5       | 157  |

6

1 **Table S6.** Brain regions showing significant signal increase and decrease between  
2 Now trials in DP task and P-task trials. Positive and negative t-values indicate  
3 increase in Now trials and P-task trials, respectively. Formats are similar to those in  
4 Table S1.

5

| Area    | Coordinate |     |    | t-value | BA    | Cluster |      |
|---------|------------|-----|----|---------|-------|---------|------|
|         | x          | y   | z  |         |       | ID      | Size |
| Frontal | -50        | 24  | 18 | 6.94    | 47/44 | 1       | 150  |
|         | -50        | 34  | 8  | 4.53    | 47    | 1       | 150  |
|         | -50        | -16 | 50 | -4.93   | 4     | 2       | 119  |

6

1 **Table S7.** Brain regions showing significant signal increase and decrease between  
 2 trials with 100% Odds and trials with the other probabilities in DP-task. Positive and  
 3 negative t-values indicate increase in trials with 100% Odds and trials with the other  
 4 probabilities, respectively. Formats are similar to those in Table S1.  
 5

| Area     | Coordinate |     |    | t-value | BA  | Cluster |      |
|----------|------------|-----|----|---------|-----|---------|------|
|          | x          | y   | z  |         |     | ID      | Size |
| Frontal  | -38        | 4   | 34 | 6.49    | 8   | 1       | 300  |
|          | -50        | 16  | 32 | 3.80    | 8/9 | 1       | 300  |
|          | 52         | 14  | 28 | 5.75    | 44  | 2       | 664  |
|          | 38         | 22  | 22 | 5.73    | 46  | 2       | 664  |
|          | 32         | 2   | 46 | 5.39    | 4/6 | 2       | 664  |
|          | 38         | 4   | 32 | 4.36    | 4/6 | 2       | 664  |
|          | 58         | 26  | 24 | 4.22    | 44  | 2       | 664  |
|          | 48         | 10  | 40 | 4.08    | 6/4 | 2       | 664  |
| Parietal | 32         | -58 | 62 | 5.13    | 7   | 3       | 535  |
|          | 34         | -52 | 46 | 4.97    | 7   | 3       | 535  |
|          | 18         | -66 | 56 | 4.41    | 7   | 3       | 535  |
|          | 40         | -48 | 62 | 4.12    | 7   | 3       | 535  |

6

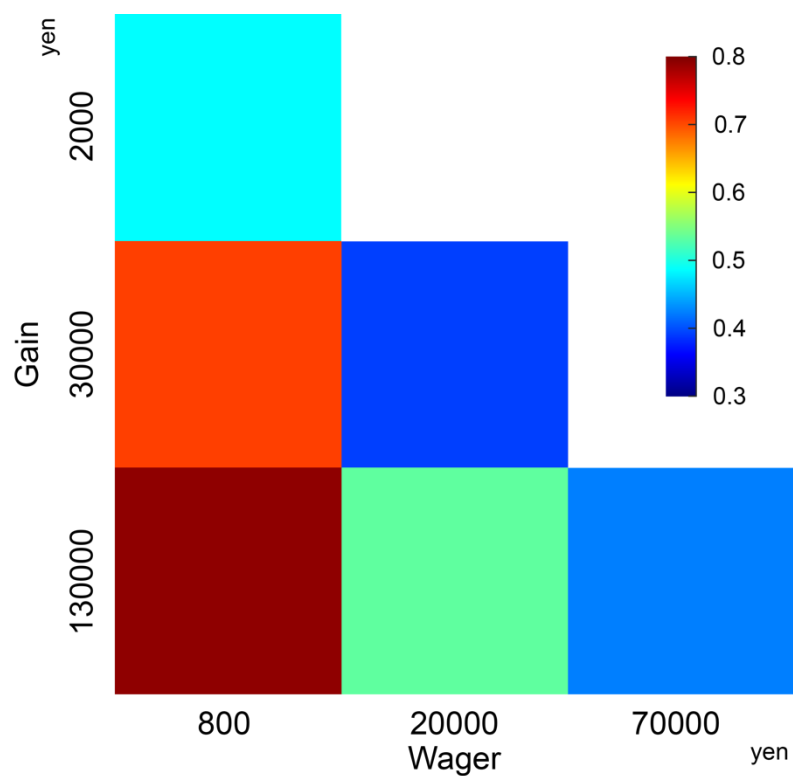

1  
2  
3  
4  
5  
6

**Figure S1.** Accept rates in DP task as a function of Gain and Wager.



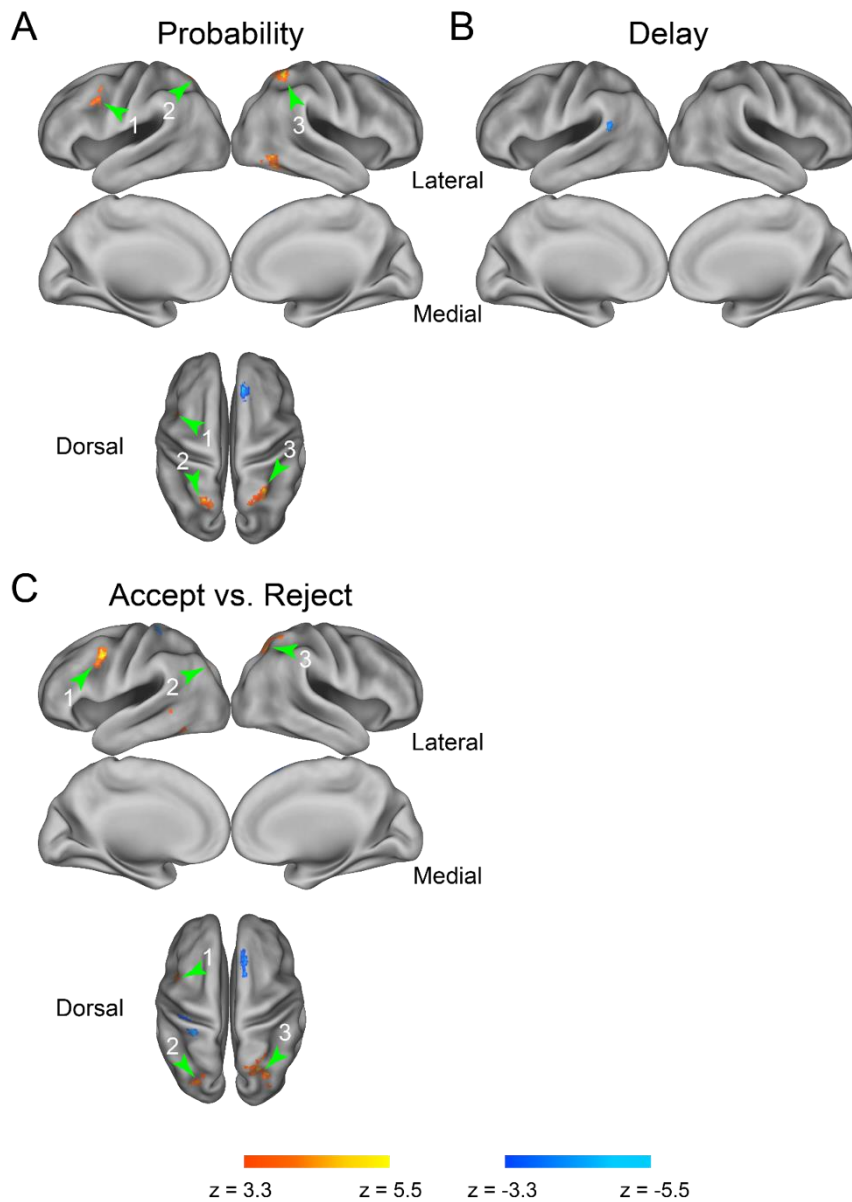

1

2 **Figure S2.** A/B) Statistical activation maps of brain regions showing activity  
3 modulation of probability (A) and delay (B) of the gamble. Maps were overlaid onto  
4 3D surface of the brain. Hot and cool signal indicate greater activity in higher and  
5 lower probability/delay, respectively. C) Statistical activation maps of brain regions  
6 showing greater activity in trials in which the gamble was accepted (hot) and rejected  
7 (cool). 1: posterior lateral prefrontal cortex; 2/3: left/right superior parietal cortex.

8

9

### DP-100% vs. D-task

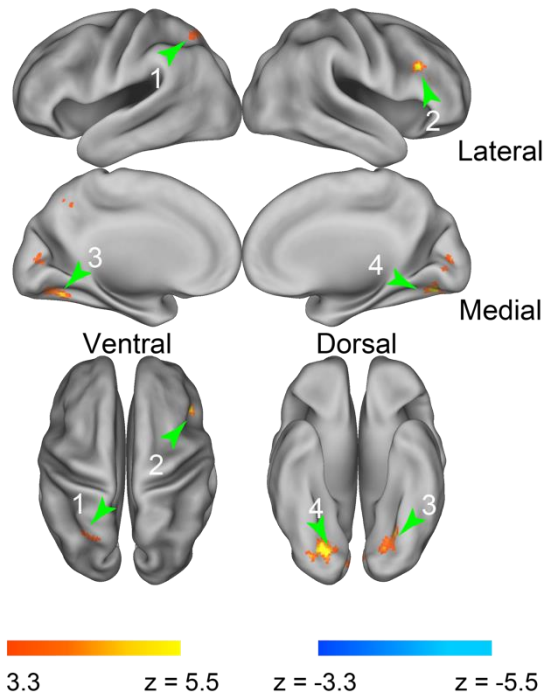

1

$z = 3.3$

$z = 5.5$

$z = -3.3$

$z = -5.5$

2

**Figure S3.** Brain activations related to processing of probability and delay in the

3

multifactor task A) Activation related to probability processing in multifactor

4

context. Reaction time of each trial coded as a parametric regressor in GLM analysis

5

to minimize general difference in cognitive load. Statistical activation maps of brain

6

regions showing greater activity in 100% Odds trials in DP-task (hot) and physically

7

equivalent control trials (D-task) (cool). Formats are similar to those in Fig 4A.

8

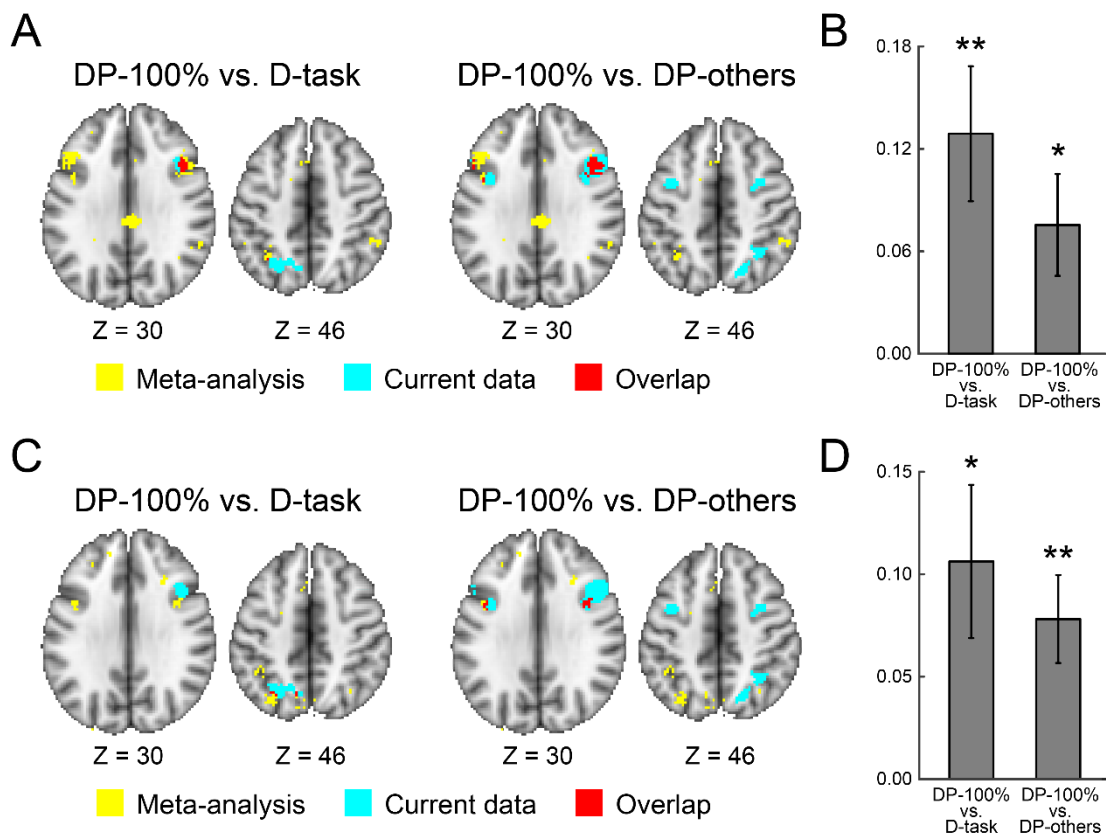

1  
2  
3  
4  
5  
6  
7  
8  
9  
10  
11  
12  
13

**Figure S4.** A) Maps of meta-analysis for cognitive/executive control with the association test are overlaid onto 2D transverse slices in yellow. Other formats are identical to those in Fig. 5B. B) Region of Interest (ROI) analysis. ROI was defined based on the meta-analysis maps in panel A, and other formats were identical to those in Fig. 5C. DP-100% vs. D-task:  $t(24) = 3.2$ ,  $P < 0.01$ ; DP-100% vs. DP-others:  $t(24) = 2.5$ ,  $P < 0.05$ . C) Maps of the meta-analysis for switching with the association test are overlaid onto 2D transverse slice in yellow. Other formats are identical to those in panel A. D) ROI analysis. ROIs were defined based on the meta-analysis maps in panel C, and other formats were identical to those in panel B. DP-100% vs. D-task:  $t(24) = 2.3$   $P < 0.05$ ; DP-100% vs. DP-others:  $t(24) = 3.6$ ,  $P < 0.01$ .
